1 Shared and Unique Evolutionary Trajectories to Ciprofloxacin Resistance in Gram-negative  
2 Bacterial Pathogens

3

4 Jaime E. Zlamal<sup>1</sup>, Semen A. Leyn<sup>1</sup>, Mallika Iyer<sup>1</sup>, Marinela L. Elane<sup>1</sup>, Nicholas A. Wong<sup>1</sup>,  
5 James W. Wamsley<sup>1</sup>, Maarten Vercruyssen<sup>2</sup>, Fernando Garcia-Alcalde<sup>2</sup>, Andrei L. Osterman<sup>1#</sup>

6 <sup>1</sup>*Sanford Burnham Prebys Medical Discovery Institute, La Jolla, CA, USA;*

7 <sup>2</sup>*Roche Pharma Research and Early Development, Immunology, Inflammation, and*

8 *Infectious Diseases, Basel, Switzerland.*

9

10 Running Head: Evolutionary Trajectories to Ciprofloxacin Resistance

11

12 # *Corresponding author ([osterman@sbpdiscovery.org](mailto:osterman@sbpdiscovery.org))*

13 Jaime E. Zlamal and Semen A. Leyn contributed equally to this work

14

## 15 **Absrtract**

16 The resistance to broad-spectrum antibiotic ciprofloxacin is detected in high rates for a wide range  
17 of bacterial pathogens. To investigate dynamics of ciprofloxacin resistance development we  
18 proposed a comparative resistomics workflow for three clinically relevant species of Gram-  
19 negative bacteria: *Escherichia coli*, *Acinetobacter baumannii*, and *Pseudomonas aeruginosa*. We  
20 combined experimental evolution in a morbidostat with deep sequencing of evolving bacterial  
21 populations in time series that reveals both shared and unique aspects of evolutionary trajectories  
22 patterns. Representative clone characterization by sequencing and MIC measurements enabled  
23 direct assessment of mutations impact on the extent of acquired drug resistance. In all three species  
24 we observed a two-stage evolution: (1) early ciprofloxacin resistance reaching 4-16-fold of  
25 wildtype MIC commonly as a result of single mutations in DNA gyrase target genes (*gyrA* or *gyrB*)  
26 and (2) additional genetic alterations affecting transcriptional control of drug efflux machinery or  
27 secondary target genes (DNA topoisomerase *parC* or *parE*).

28

## 29 **Importance**

30 The challenge of spreading antibiotic resistance calls for systematic efforts to develop more  
31 “irresistible” drugs based on deeper understanding of dynamics and mechanisms of antibiotic  
32 resistance acquisition. To address this challenge, we have established a comparative resistomics  
33 approach which combines experimental evolution in a continuous culturing device, the  
34 morbidostat, with ultradeep sequencing of evolving microbial populations to identify evolutionary  
35 trajectories (mutations and genome rearrangements) leading to antibiotic resistance over a range  
36 of target pathogens. Here we report the comparative resistomics study of three Gram-negative  
37 bacteria (*Escherichia coli*, *Acinetobacter baumannii*, and *Pseudomonas aeruginosa*), which

38 revealed shared and species-specific aspects of the evolutionary landscape leading to robust  
39 resistance against the clinically important antibiotic ciprofloxacin. In addition to specific findings,  
40 the impact of this study is in highlighting the anticipated utility of a morbidostat-based comparative  
41 genomic approach to guide rational optimization of treatment regimens for current antibiotics and  
42 development of novel antibiotics with minimized resistance propensities.  
43

## 44 **Introduction**

45           Increasing antibiotic resistance is a premier threat to modern medicine. This danger  
46 necessitates expanded research into the mechanisms by which organisms gain resistance and  
47 continued development of new drugs to replace those becoming ineffective. A second-generation  
48 fluoroquinolone antibiotic, ciprofloxacin (CIP) was introduced for medical use in 1987 and  
49 boasted a wider spectrum of efficacy than first-generation quinolones (1). Ciprofloxacin is  
50 commonly prescribed as a front-line treatment against a broad range of bacterial infections (2, 3).  
51 Quinolone antibiotics target bacterial DNA gyrase (GyrA/GyrB) and topoisomerase IV  
52 (ParC/ParE), enzymes which control DNA supercoiling during replication and transcription. By  
53 binding to these enzymes when they are complexed with DNA, CIP inhibits the repair of DNA  
54 breaks and causes irreversible damage to the genome (4-8).

55           A weak to moderate resistance to CIP can occur through a single missense mutation in one of the  
56 target genes yielding resistant variants, even at drug levels substantially below MIC (Minimum  
57 Inhibitory Concentration). Thus, a reported most common GyrA:S83L CIP-resistant variant of *E.*  
58 *coli* has emerged at the drug concentration of only 1/230 of MIC (9). Further stepwise acquisition  
59 of additional mutations in the presence of greater drug challenge (10, 11) confers increased  
60 resistance to fluoroquinolones (12, 13). The resulting highly resistant forms typically contain a  
61 combination of mutations in target genes (GyrAB and/or ParCE), species-specific efflux pumps  
62 (such as AcrABC in *E. coli*), and porins mediating drug influx (14-18).

63           The observed similarity of intrinsic CIP-resistance mechanisms in divergent target pathogens is  
64 consistent with the universal mechanism of action of this broad-spectrum drug. Nevertheless,  
65 distinct species display different resistibility potential with respect to the dynamics and extent of  
66 acquired resistance. The primary objectives of this study were to assess and compare the dynamics

67 of CIP-resistance acquisition and resistance mechanisms in three divergent species representing  
68 difficult-to-treat Gram-negative bacteria, *Escherichia coli*, *Acinetobacter baumannii*,  
69 and *Pseudomonas aeruginosa* in a standardized setting of a continuous culturing device. Among  
70 these groups of pathogens, *A. baumannii* is of particular concern due to its genomic plasticity, a  
71 feature which gives rise to diverse isolates displaying preexisting and readily-acquired multiple  
72 drug resistance (19, 20). Another common nosocomial pathogen, *P. aeruginosa* is also known to  
73 cause dangerous antibiotic-resistant infections. In our comparative study, we have included the  
74 best studied model Gram-negative bacterium, *E. coli* K-12, a close relative of clinically relevant  
75 pathogenic strains of *E. coli*.

76 Although some mutations conferring CIP-resistance observed in clinical isolates and laboratory  
77 studies of all three target species were previously reported (10, 21, 22), a direct comparison of  
78 their evolutionary trajectories is complicated due to different selection conditions. In traditional  
79 experimental evolution studies, selection proceeds through a series of bottlenecks reflecting  
80 specifics of the experimental setup and bacterial population size. Thus, a serial transfer of small-  
81 size bacterial cultures leads to the predominant propagation of high-frequency/low-fitness  
82 mutants, while studies of large bacterial populations tend to yield low-frequency/high-fitness  
83 mutants that are commonly isolated from patients with CIP-resistant infections (10, 23). Another  
84 variable parameter defining the outcome of experimental evolution is the Mutant Selection  
85 Window (MSW)(24, 25). The MSW represents a drug concentration range enabling effective  
86 elimination of less resistant cells and propagation of more resistant cells. A morbidostat (constant  
87 morbidity) approach used in this study is based on an automated dynamic adjustment of the MSW,  
88 shifting upward over the course of experimental evolution (26, 27). This technique allows us to

89 alleviate selection bottlenecks and enrich evolving bacterial populations with more robust resistant  
90 variants.

91 For a comparative CIP-resistomics analysis of the three selected Gram-negative bacteria in a  
92 standardized morbidostat-driven setup (**Figure 1a,b**), we leveraged an experimental evolution  
93 workflow developed and validated in our previous model study on evolution of triclosan resistance  
94 in *E. coli* (28). Briefly, the workflow used in this study (**Supplementary Figure S1**) includes: (i)  
95 competitive outgrowth of six parallel bacterial cultures in a custom-engineered continuous  
96 culturing device, the morbidostat, under gradually increasing antibiotic concentration; followed by  
97 (ii) sequencing of total genomic DNA from bacterial population samples taken as time series; (iii)  
98 identification and quantitation of sequence variants (mutations, small indels, mobile elements  
99 insertions) reflecting evolutionary dynamics and inferred resistance mechanisms; and (iv)  
100 experimental characterization of genotype-to-phenotype associations via mapping of mutations  
101 and determination of MIC values in selected individual clones.

102 The performed analysis yielded the identification of mechanistically and clinically relevant CIP-  
103 resistance conferring mutations. This investigation revealed both shared and species-specific  
104 aspects of the evolutionary dynamics of resistance acquisition. It also confirmed the utility of the  
105 established workflow for comparative resistomics of known antibiotics, and potentially novel drug  
106 candidates, over a broad range of bacterial pathogens.

107

## 108 **Methods**

109 **Morbidostat setup.** Experimental evolution of CIP-resistance was performed using an optimized  
110 version of a morbidostat device, which was engineered and validated in our previous study on the  
111 evolution of triclosan resistance in *E. coli* (28). The general design is based on the principles

112 described in (26, 27), extending the chemostat approach toward evolution of drug resistance. In  
113 the morbidostat, culture densities are maintained by regular automated dilutions with media  
114 containing or not containing antibiotic. This leads to gradual adaptation of bacterial populations to  
115 higher drug concentrations.

116 The detailed technical description of morbidostat hardware and accompanying software is  
117 provided in GitHub ([https://github.com/sleyn/morbidostat\\_construction](https://github.com/sleyn/morbidostat_construction)). Briefly, the main  
118 components of the device (**Figure 1a**) are: (i) six 20 mL glass tubes used as bioreactors, with  
119 magnetic stir bars and cap assemblies containing three air-tight needle ports for: (a) introduction  
120 of fresh media and continuous air flow for culture aeration, (b) liquid displacement after dilution,  
121 and (c) sample collection; (ii) silicone rings used to secure reactors in 3D-printed plastic housings  
122 which each contain a laser and a sensor diode for measuring culture turbidity; (iii) a small air-  
123 pump to provide aeration for growing cultures (fitted with 0.22  $\mu\text{m}$  pore filters to block  
124 contamination in air feedlines) and enable liquid displacement from reactors (over a fixed level  
125 corresponding to a total volume of 20 mL); (iv) a thermoregulated heater and fan to control the  
126 temperature inside the morbidostat enclosure; (v) two 2 L bottles with tubing connecting each to a  
127 peristaltic pump which controls the flow of media (with and without antibiotic) to the reactors,  
128 where an assembly of 12 check valves (2 valves per reactor, each connected with one of the two  
129 pumps) controls delivery of media to individual reactors during each dilution; and (vi) a six-  
130 position magnetic stir plate which agitates cultures and enables mixing of media upon dilution. An  
131 Arduino-based microcontroller is programmed to control the following main parameters of the  
132 run: (i) enclosure temperature; (ii) time between dilutions (cycle time, CT); and (iii) selection of  
133 the volume delivered by Pump 1 (media without drug) or Pump 2 (media with drug) for each  
134 culture dilution, depending on the culture turbidity and growth rate in each tube. A user interface

135 for parameter manipulation and real-time status display (including growth curves) is run on a PC  
136 using MegunoLink software (<https://www.megunolink.com/>, v. 1.17.17239.0827 for CEC-2,  
137 CEC-4 and CAB runs and v. 1.32.20005.0105 for PAC-1 and PAC-2 runs).

138 Automated dilutions are controlled using the following encoded logic (**Figure 1b**):

139 1) In the active “dilution mode”, the optical density (OD) at the end of the current cycle (OD<sub>1</sub>) is  
140 compared with three parameters: (i) the predefined Lower Threshold (LT, typically  $\leq 0.15$ ); (ii)  
141 predefined Drug Threshold (DT, typically  $\sim 0.3$ ); and (iii) OD reached during the previous cycle  
142 (OD<sub>0</sub>). All OD values are corrected by adding OD of fresh media with antifoam.

143 2) The dilutions are always made by a predefined volume (typically  $V = 2$  or  $4$  mL); if  $OD_1 \geq DT$   
144 and  $(OD_1 - OD_0) \geq 0$  the drug-containing media (Pump 2) is used with the interval corresponding  
145 to the predefined CT (typically 15–20 min); else drug-free media (Pump 1) is added.

146 3) If  $OD_1 < LT$ , the system performs hourly dilutions with drug-free media. In the beginning of  
147 the run, this allows all six cultures to reach the same minimal density ( $OD_1 = LT$ ) prior to entering  
148 the active dilution mode. During the run, this “safe mode” prevents a complete wash-out of the  
149 culture after an excessive dose of drug.

150 **Morbidostat runs.** Drug-free base medium consisted of Cation-Adjusted Mueller Hinton Broth  
151 (MHB)(Teknova) with a final concentration of 2% DMSO (except for CEC-2 and PAC-1 runs,  
152 which did not have DMSO) and 1/2,500 dilution of Antifoam SE-15 (Sigma). An autoclaved 1/50  
153 concentration stock of the antifoam was added aseptically to the filter-sterilized (0.22 $\mu$ M)  
154 MHB/DMSO mixture. The only difference between the base medium and drug-containing medium  
155 was the addition of filter-sterilized Ciprofloxacin (Sigma-Aldrich). Starting populations of *E. coli*  
156 BW25113, *A. baumannii* ATCC 17978, and *P. aeruginosa* ATCC 27853 strains began from  
157 original glycerol stocks of parent organisms from ATCC; stocks were streaked onto LB-agar plates



158 for isolation and grown overnight in MHB at 37°C. Liquid cultures were inoculated from single  
159 colonies and grown at 37°C, shaking to an optical density of 0.2-0.4 OD<sub>600</sub>, then diluted to 0.02  
160 OD<sub>600</sub> with drug-free medium in reactors to begin the run. All reactors in a single evolutionary run  
161 with *E. coli* were started from a liquid culture sourced from one isolated colony. Different  
162 individual colonies were chosen to seed reactor cultures for *A. baumannii* and *P. aeruginosa*.  
163 Glycerol stocks from these starting cultures were preserved, and cell pellets were used to determine  
164 genomic sequences to account for the anticipated larger diversity of preexisting variants (see  
165 below). Five separate evolutionary runs were performed: two with *E. coli* BW25113 (CEC-2 and  
166 CEC-4), one with *A. baumannii* ATCC17978 (CAB-1), and two with *P. aeruginosa* ATCC27853  
167 (PAC-1 and PAC-2). Of the two *E. coli* runs, CEC-2 was performed under a steeper increase in  
168 drug concentration than CEC-4. This was achieved by using a higher drug concentration in Pump  
169 2 media: 0.156 mg/L or 10-fold of CIP MIC value (0.0156 mg/L as determined for the unevolved  
170 strain in the same media) was used in the beginning of the run, increasing to 0.468 mg/L (30xMIC)  
171 on Day 2 of evolution and then to 2.34 mg/L (150xMIC) on Day 4. The second *E. coli* run (CEC-  
172 4) used a CIP gradient starting from the lower concentration of 0.001mg/L (0.625xMIC) and  
173 gradually increasing up to 1.248 mg/L (80xMIC) over a more extended time period (6 days). The  
174 CAB-1 run started at 0.195 mg/L (1.25xMIC, given MIC=0.156 mg/L for *A. baumannii* ATCC  
175 17978 unevolved strain) and progressed up to 40x in 4 days. For morbidostat runs with *P.*  
176 *aeruginosa*, a modified control software was used  
177 ([https://github.com/sleyn/morbidostat\\_v2\\_construction](https://github.com/sleyn/morbidostat_v2_construction)), which allows the user to vary the volume  
178 of drug-containing media added at every dilution step. Therefore, the media in Pump 2 remained  
179 at the concentration of 7.8mg/L (25-50xMIC, as for unevolved *P. aeruginosa* ATCC 27853 strain

180 MIC=0.156-0.313 mg/L) throughout the entire experiment in both PAC-1 and PAC-2 runs, with a  
181 continual increase in drug concentration controlled through the software alone.

182 Over the course of all runs, dilutions were performed with  $V = 4$  mL (20% of the reactor volume).  
183 The calculated changes in drug concentration in each reactor were plotted (as in **Figure 1c-e**) along  
184 with recorded changes in OD (see **Supplementary Methods** and **Supplementary Figure S2** for  
185 a complete set of parameters and plots generated for each run). As a result of optimization of the  
186 originally published morbidostat device and workflow (28), all runs were performed continuously  
187 (up to 6 days) without loss of sterility in bottles and feedlines. In the case of *P. aeruginosa* (but  
188 not *E. coli* or *A. baumannii*), the process included daily transfer of the culture (along with sample  
189 collection) to a fresh sterile glass reactor tube in order to minimize laser interference from biofilm  
190 gradually accumulating on the walls of the reactor. Otherwise, 10 mL samples were collected with  
191 a fresh sterile syringe via a dedicated needle port at one (or two) timepoints each day based on the  
192 OD, growth rates, and drug concentrations established in each reactor. All collected samples were  
193 used to prepare glycerol stocks (for further clonal analysis) and to extract genomic DNA from  
194 frozen cell pellets (prepared from the main portion of each sample).

195 **Genomic DNA extraction and sequencing.** DNA was extracted using GenElute™ Bacterial  
196 Genomic DNA Kit Protocol NA2110 (Sigma Aldrich) according to the protocol for Gram-negative  
197 cells. Total DNA from evolutionary run samples were extracted from frozen cell pellets. DNA of  
198 selected clones was extracted from fresh pellets of liquid cultures grown 8–16 hrs at 37°C.

199 Nonamplified DNA libraries for Illumina sequencing of all population samples (and some of the  
200 analyzed clones) were prepared using NEBNext® Ultra™ II FS DNA Library Prep Kit for  
201 Illumina modules E7810L and E7595L (New England BioLabs) following the manufacturer  
202 protocol for use with inputs  $\geq 100$  ng with modifications to eliminate PCR-amplification steps.

203 IDT for Illumina TruSeq DNA UD Indexes 20022370 or TruSeq DNA CD Indexes 20015949  
204 (Integrated DNA Technologies, Illumina) were used in place of NEBNext adaptors. Library size  
205 selection and clean up were performed using AMPure XP beads (Beckman Coulter) following the  
206 NEB protocol. An alternative faster and more cost-efficient approach was used for up to 96-plex  
207 sequencing of DNA from some of the analyzed clones. Clone DNA was prepared for Illumina  
208 sequencing using the PlexWell PW384 kit and included adaptors (seqWell) following  
209 manufacturer instructions.

210 Prepared libraries were quantified using NEBNext® Library Quant Kit for Illumina® E7630L  
211 (New England BioLabs) and pooled with volumes adjusted to normalize concentrations and  
212 provide for ~1,000-fold genomic coverage for population samples (20–30 samples per HiSeq lane  
213 depending on the genome size) or ~200-fold coverage (up to 96 samples per lane) for clones.  
214 Library size and quality were analyzed with the 2100 Bioanalyzer Instrument (Agilent). Pooled  
215 DNA libraries were sequenced by Novogene Co. on Illumina HiSeq X Ten or HiSeq 4000  
216 machines using paired end 150bp read length.

217 Nanopore long-read sequencing was used to verify and complete assemblies for unevolved  
218 genomes. DNA samples were prepared for long-read Nanopore sequencing using the Nanopore  
219 Rapid Barcoding gDNA Sequencing kit SQK-RBK004 (Oxford Nanopore Technologies)  
220 according to the manufacturer protocol and sequenced using MinION and flow cell FLO-MIN106.

221 **Sequence data analysis and variant calling.** The depiction of the sequencing data analysis  
222 pipeline (**Supplementary Figure S3**) and statistics for each sample (coverage, number of reads,  
223 and percentage of mapped reads) are provided in the Supplementary Materials (**Supplementary**  
224 **Table S1**). Briefly, Illumina sequencing read quality was assessed with FastQC v. 0.11.8 (29).  
225 Adaptor trimming was performed using Trimmomatic v. 0.36 (30). In population sequencing data

226 analysis, we used BWA MEM v. 0.7.13 for read alignment against reference genomes (31). SAM  
227 and BAM file manipulations were performed with PICARD v. 2.2.1 tools  
228 (<https://broadinstitute.github.io/picard/>) and samtools v. 1.3 (31). Realignment and base quality  
229 score recalibration were performed with the LoFreq Vitebri module (32) and Genome Analysis  
230 ToolKit v. 3.5 (33). For variant calling, SNPs and small indels were identified with LoFreq v.  
231 2.1.3.1 (32). IS element rearrangements in population samples were predicted by a new iJump  
232 software developed for this purpose (<https://github.com/sleyn/ijump>). IS elements in reference  
233 genomes were predicted using the ISFinder database (34). Variant effects were annotated with  
234 snpEff v. 4.3 (35). VCF file manipulations were performed with bcftools v. 1.3 (36). Clonal  
235 sequencing data were analyzed using breseq software (37). Copy number variations were checked  
236 using the CNOGpro v. 1.1 R language package (38). R version 3.6.0 was used. Repeat regions  
237 were masked based on analysis produced by MUMmer v. 3.1 (39).

238 *A de novo* assembly of the *Acinetobacter baumannii* ATCC 17978 reference genomes for each of  
239 the six clones (samples A1–A6) used as the starting point for experimental evolution was  
240 accomplished by a hybrid approach combining Illumina (short reads) and Nanopore (long reads)  
241 data. Nanopore reads were base-called and demultiplexed using Albacore v. 2.3.4 base-caller  
242 (available on the ONT community site). To increase coverage with long reads, we performed a  
243 second round of demultiplexing of unclassified reads with Porechop v. 0.2.4  
244 (<https://github.com/rrwick/Porechop>). Adaptors were trimmed with Porechop. Both reads called  
245 with Albacore and Porechop were combined and used along with Illumina reads to make *de novo*  
246 assembly with SPAdes v. 3.13.0 (40). The assembly was annotated using RASTtk web server (41).

247 For detailed description of sequencing data processing see Supplementary Methods.

248 **Minimum inhibitory concentration (MIC) determination.** MIC values were determined for  
249 parent strains and selected individual clones to connect mutations and genome rearrangements  
250 with resistance phenotype. MIC assays were prepared with twofold increasing concentrations of  
251 Ciprofloxacin by the broth dilution method following CLSI and EUCAST standard protocols,  
252 using resuspended fresh colonies in Cation-Adjusted Mueller Hinton broth medium (42).  
253 Measurements were performed using: (i) a growth curve method in microtiter plates at a  
254 wavelength 600nm in a BioTek ELx808 plate reader at 37°C (for *E. coli* and *A. baumannii*), or (ii)  
255 an end point analysis (for *P. aeruginosa*, results read at 17 hours).

256 **Data availability.** Clonal and population sequencing data are available in the SRA database by  
257 BioProject accession number PRJNA598012  
258 (<https://www.ncbi.nlm.nih.gov/bioproject/PRJNA598012>); the novel *A. baumannii* ATCC 17978  
259 annotated assembly is available in the European Nucleotide Archive by sample accession  
260 number ERS4228590 (<http://www.ebi.ac.uk/ena/data/view/ERS4228590>). The reference  
261 genomes were downloaded from the PATRIC database(43). PATRIC IDs are: 679895.18 for  
262 *E.coli* BW25113, 287.6323 for *P. aeruginosa* ATCC 27853.

263 **Code availability.** Custom code and detailed description of sequencing data processing is  
264 deposited to GitHub ([https://github.com/sleyn/paper\\_cipro\\_EC\\_AB\\_PA\\_2021](https://github.com/sleyn/paper_cipro_EC_AB_PA_2021)).

## 265 **Results and Discussion**

### 266 **Evolution of CIP-resistance in *E. coli* BW25113**

267 Two evolutionary runs were performed to assess the impact of different ranges and rates of CIP  
268 concentration escalation on the dynamics and spectra of acquired mutations in *E. coli*  
269 (**Supplementary Figure S2A, B**). For both runs, a complete list of significant sequence variants  
270 (passing all filters implemented in the computational pipeline) observed in each reactor and  
271 timepoint is provided in **Supplementary Tables S2B and S2C**.

272 Several preexisting low-frequency variants (mostly ~2-3%) detected in the unevolved population  
273 at timepoint 0 were distinct between independently prepared inoculates used in each of the two  
274 runs, pointing to their stochastic nature. Most of these variants disappeared from populations over  
275 the course of selective outgrowth except two SNPs in genes encoding: (i) uncharacterized protein  
276 YigI:A146T (BW25113\_3820); and (ii) uncharacterized transporter of BCCT family  
277 YeaV:V428D (BW25113\_1801). These two variants expanded from 3% to 83% of the population  
278 in Reactor 2, and from 13% to 54% in Reactor 6, respectively, by the end of the CEC-2 run;  
279 notably, each mutation apparently coupled with the common GyrA:D87Y mutation  
280 (**Supplementary Table S2A**).

281 The range and dynamics of major acquired mutations were generally similar in both runs, CEC-2  
282 and CEC-4 (**Supplementary Tables S2A, S2B**). Of those, the earliest and the most prominent  
283 were missense mutations in the A and B subunits of DNA gyrase (GyrA and GyrB), a primary CIP  
284 target. These mutations typically emerged within the first 24 hrs and sustained or further expanded  
285 in all populations unless outcompeted by other primary target mutations. As such, a GyrB mutation  
286 Ser464Phe, which emerged at an early stage in all six reactors of the CEC-2 run, was rapidly  
287 outcompeted by GyrA mutant variants in three of these reactors (**Figure 2a, Supplementary**

288 **Figure S4A**). An alternative GyrB mutant variant, Ser464Tyr, dominated all four reactors at an  
289 early stage of the CEC-4 run. This variant sustained in all but one reactor (**Supplementary Figure**  
290 **S4B**), where it was outcompeted by a GyrA:Asp87Tyr variant combined with a disruptive deletion  
291 in SoxR (**Figure 2b**). These distinctive evolutionary trajectories may be driven by a number of  
292 factors including different drug escalation profiles (**Supplementary Figure S2A,B**) and different  
293 effects of the two alternative substitutions at GyrB:Ser464 on CIP resistance and fitness.

294 The mutant variant GyrA:Asp87Tyr was among the most prominent variant in GyrA and the only  
295 common one between the two *E. coli* evolutionary runs. Other substitutions at this position  
296 included one major variant, Asp87Gly (observed at varying frequencies in all but one reactor of  
297 the CEC-2 run) and one minor variant, Asp87Asn (observed at low frequency in one reactor of the  
298 CEC-4 run). The only other high frequency GyrA:Ser83Leu variant was observed in one reactor  
299 (R4) of the CEC-2 run. These two residues are known to be the most commonly mutated *gyrA*  
300 residues in CIP-resistant *E. coli* (10, 44). Of the two other low frequency GyrA variants, the  
301 Ala119Glu substitution was previously reported in quinolone-resistant *E. coli* and *Salmonella* (10,  
302 45). The second variant, GyrA:Asp82Gly, was also previously observed in these species as well  
303 as in CIP-resistant *Bartonella bacilliformis* (45, 46). All observed amino acid substitutions were  
304 located in the vicinity of the known CIP binding site, close to a DNA binding pocket at the interface  
305 of the DNA gyrase subunits A and B (**Figure 3**). No mutations in the Topoisomerase IV subunit  
306 A gene *parC*, a known secondary target of CIP, was observed in our study of *E. coli*, and only one  
307 low frequency variant with Arg303Ser mutation was observed in the gene *parE* encoding subunit  
308 B of this enzyme.

309 Clones representing major GyrA:Ser83Leu and GyrB:Ser464Phe/Tyr mutant variants without any  
310 additional mutations were isolated from respective reactors and exhibited an 8–16-fold increase in

311 CIP-MIC values compared to the parental (unevolved) strain (**Supplementary Table S3A**). This  
312 magnitude of the effect on CIP-resistance is consistent with previous reports(44, 47). Nearly all  
313 isolated clones representing the GyrA:Asp87Gly variant contained additional mutations leading to  
314 efflux upregulation (as described below). In our study, GyrB mutations appear to have a somewhat  
315 smaller impact on resistance compared to GyrA mutations (on average ~2-fold) as seen  
316 previously(48).

317 Numerous additional mutations emerged on the background of GyrA or GyrB mutant variants at  
318 a later stage of experimental evolution, dominated by frameshifts, disruptive deletions, and IS  
319 element insertions. These mutations appeared along with an increase of drug concentration, and  
320 most of these events are predicted to lead to upregulation of efflux machinery. The most prominent  
321 in both runs were the loss-of-function events affecting transcriptional regulators MarR, AcrR, and  
322 SoxR that negatively control the expression of well-known efflux pumps MarAB and AcrAB, and  
323 an outer membrane protein TolC (**Figure 4a**). Disruptive mutations occurred in over 30 distinct  
324 locations in the gene *marR* (**Supplementary Tables S2A,B**). Similar events were shown  
325 previously to increase MarA expression, thus contributing to CIP-resistance and to a broader multi-  
326 drug resistance phenotype(49, 50) . Clinical *E. coli* isolates with fluoroquinolone resistance  
327 commonly contain mutations in *marR*, causing constitutive expression of the *mar* operon (51).  
328 Deletion of the C-terminus of MarR increased *E. coli* CIP resistance *in vivo* (52), and inactivation  
329 of MarR has been shown to increase *marA* expression, effecting drug efflux by way of  
330 transcriptional amplification of *acrAB* and *tolC* pumps (17, 53).

331 Among several missense mutations (observed only in CEC-2 run), the most prominent amino acid  
332 substitution MarR:Thr39Ile (which expanded up to 1/3 of bacterial population when combined  
333 with GyrA:Asp87Tyr in reactor R2) affected the known DNA-binding site of the MarR repressor



334 (54). Dynamics of acquisition of MarR mutational variants appear to have been faster in the CEC-  
335 2 run than in CEC-4 (after 48 hrs vs 96 hrs, respectively) reflecting the sharper increase of drug  
336 concentration in CEC-2 run. Clones with *marR* mutations combined with *gyrA* or *gyrB* mutations  
337 exhibited MIC of 4–8-fold higher than corresponding clones with only mutations in DNA gyrase  
338 **(Supplementary Table S3A).**

339 IS element insertions, frameshifts, and deletions occurred in multiple positions of both the *acrR*  
340 gene encoding a transcriptional regulator of the *acrAB* operon, as well as in the intergenic region  
341 of the *acrA*<>*acrR* divergon **(Figure 4a)**. These variants appeared at relatively low frequency at  
342 the latest stage of experimental evolution, after ~90 hrs in both runs **(Figure 2a, Supplementary**  
343 **Figure S4A,B)**. Among isolated clones, *acrR* mutations were found only as combined with  
344 mutations in *marR* and one of the DNA gyrase subunits (*gyrA* or *gyrB*). These triple mutants  
345 exhibited the highest MIC values observed in this study, up to 128-fold higher than wildtype MIC  
346 **(Supplementary Table S3A).**

347 Point mutations, frameshifts, and deletions also occurred frequently in *soxR*, the redox-sensitive  
348 repressor which negatively regulates SoxS, transcriptional activator of efflux genes *acrAB* and  
349 *tolC* **(Figure 4b)**. The SoxR variant Gly121Asp, which occurred in the CEC-2/R5 population, has  
350 recently been shown to increase SoxS expression 12-fold (50). Similar to *marR*, mutations in *soxR*  
351 emerged between 48 and 96 hrs, more rapidly in CEC-2 than CEC-4 **(Figure 4b, Supplementary**  
352 **Figure S4A and Supplementary Figure S4B)**. Deletions and small insertions in *soxR* were found  
353 in clones along with DNA gyrase mutations contributing to a further increase of MIC by a factor  
354 of 4–8x **(Supplementary Table S3A).**

355 Despite the relatively low abundance of individual mutations in efflux regulators *marR*, *acrR*, and  
356 *soxR*, a very high combined frequency of efflux-upregulating mutations in both CEC-2 and CEC-

357 4 makes increased efflux a predominant mechanism for elevating CIP-resistance on the  
358 background of *gyrAB* mutations. This trend is consistent with other published studies including  
359 laboratory evolution experiments and analysis of CIP-resistant clinical isolates of *E. coli* (23, 55).

360

### 361 **Evolution of CIP-resistance in *Acinetobacter baumannii* ATCC 17978**

362 To accurately assess preexisting variations that occur at much higher frequency in *A. baumannii*  
363 than in *E. coli* K12, we first sequenced and assembled a complete genome corresponding to our  
364 stock of *A. baumannii* ATCC 17978 (ENA Project: PRJEB36129). This assembly was further used  
365 as a reference for this study and featured substantial differences with publicly available sequences:  
366 16 variants compared to the GCA\_001593425 assembly and 87 variants compared to the  
367 GCA\_000015425.1 assembly (at >85% frequency threshold) over 98.5% and 99.0% mapped  
368 reads, respectively. Unlike in *E. coli* runs, we prepared each of the starter cultures from individual  
369 colonies and sequenced total genomic DNA isolated from these cultures (samples A1-A6). To  
370 account for potential genomic rearrangements, we used a hybrid approach combining the data from  
371 high-coverage Illumina sequencing (short reads) with Oxford Nanopore sequencing (long reads).  
372 In contrast to the public genomes, this approach revealed that all starting cultures have pAB3 (56)  
373 as an extrachromosomal plasmid (in public genomes it is integrated to the chromosome) and an  
374 additional 52kb locus (**Supplementary Table S1C**).

375 The single *A. baumannii* evolutionary run was performed using a mild drug escalation regimen  
376 which started from a CIP concentration in Pump 2 corresponding to 1.25xMIC. The dynamics of  
377 CIP-resistance acquisition observed in five parallel reactors appeared faster in the case of *A.*  
378 *baumannii* as compared to *E. coli* (**Figure 1d, Supplementary Figure S2C**). One reactor (R1)  
379 was excluded due to technical failure. Resistance was driven at the first stage by a single *gyrA*

380 mutation Ser81Leu, which was first detected after Day 1 and expanded to  $\geq 95\%$  by Day 3 (**Figure**  
381 **2c,d, Supplementary Table S2D**). This mutation leads to  $\sim 8$ -fold increase in MIC  
382 (**Supplementary Table S2B**), which is similar to the impact of the position-equivalent  
383 GyrA:Ser83Leu variant of *E. coli* (**Supplementary Table S2A**). The same mutation is commonly  
384 found in CIP-resistant *A. baumannii* isolates with a similar impact on MIC, as reported for *A.*  
385 *baumannii* ATCC 19606 (57).

386 At the next stage of experimental evolution, adaptation to higher drug levels was attained via a  
387 variety of mutations apparently upregulating drug efflux machinery (**Figure 2c, Figure 4b,**  
388 **Supplementary Figure S4C, Supplementary Table S2C**). Such upregulation was achieved with  
389 three classes of variants: (i) inactivation of transcriptional repressor AdeN of the efflux pump  
390 AdeIJK caused exclusively by insertion of different mobile elements (*ISAb1*, *ISAb11*, and  
391 *ISAb12*); (ii) polar effects from insertion of IS elements (*ISAb1*, *ISAb12*, *ISAb18*, and *ISAbcsp3*)  
392 in the intergenic region or in the gene encoding membrane-associated phospholipid phosphatase  
393 immediately upstream of the *adeI* gene; and (iii) several missense mutations in the AdeS sensory  
394 histidine kinase of a two-component system (AdeSR) positively regulating another efflux pump  
395 AdeABC (58-60). IS element insertions upstream of the *adeIJK* operon were previously reported  
396 to reduce susceptibility of *A. baumannii* to ciprofloxacin and other substrates of the respective  
397 efflux pump (61, 62). Notably, one of the AdeS mutant variants, AdeS:Asp60Gly, expanded up to  
398 65% in reactor R3 population by the end of Day 4. An apparent prevalence by abundance of  
399 AdeABC vs AdeIJK upregulating variants (see Table 1) is consistent with a recent report on higher  
400 efficiency of the AdeABC transporter than the AdeIJK transporter in efflux of hydrophilic agents  
401 such as fluoroquinolones (63).

402 The upregulation of the efflux pump AdeIJK on the background of the GyrA:Ser81Leu variant led  
403 to an additional 2–4-fold increase in MIC (**Supplementary Table S3B**). This was determined for  
404 individual clones representing mutant variants of both types: IS-insertions in the *adeN* gene, and  
405 IS-insertions in the intergenic region upstream of gene *adeI* (16xMIC and 32xMIC, respectively  
406 compared to unevolved strain). No mutations were observed in genes associated with yet another  
407 known multidrug efflux system of *A. baumannii*, AdeFGH (64).

408 Finally, the highest level of CIP-resistance was achieved as a result of a combination of the initial  
409 GyrA:Ser81Leu variant with additional missense mutations in the *parC* gene encoding DNA  
410 topoisomerase IV subunit A, a secondary target of fluoroquinolone drugs. These mutations  
411 emerged only at the latest stage of experimental evolution (Day 4)(**Figure 2d, Supplementary**  
412 **Figure S4C**). The variant ParC:Asn334Tyr only reached low frequency (4% in R2) in one reactor,  
413 whereas two other variants (ParC:Ser84Leu and ParC:Glu88Lys) emerged in several reactors  
414 reaching much higher frequency (up to 86%)(**Supplementary Table S2C**). Both variants  
415 exhibited resistance of 128-fold compared to the unevolved strain, the highest increase in MIC  
416 observed with individual clones (**Supplementary Table S2B**). These two mutated residues are  
417 position-equivalent to the most commonly mutated Ser80 and Glu84 residues in *E. coli* ParC (57,  
418 65, 66). A commonly reported CIP-resistant mutation Ser458Ala in the Topoisomerase IV subunit  
419 B gene *parE* (67) was observed in the last timepoint in only one reactor (R1) at low abundance  
420 (4%).

421

#### 422 **Evolution of CIP-resistance in *Pseudomonas aeruginosa* ATCC27853:**

423 To further expand the comparative resistomics approach and assess common and species-specific  
424 trends in the dynamics of acquisition and mechanisms of CIP-resistance, we applied the optimized

425 morbidostat-based experimental evolution workflow to study another important Gram-negative  
426 pathogen, *Pseudomonas aeruginosa*. Two evolutionary runs (PAC-1 and PAC-2) with *P.*  
427 *aeruginosa* ATCC27853 were performed using starter cultures prepared from six distinct colonies.  
428 In contrast to *A. baumannii*, this analysis did not detect any substantial variations between these  
429 cultures (**Supplementary Table S2D, S2E**). Some of the starter cultures contained up to 20  
430 preexisting low frequency variants (in a range of 1-10%). These low-frequency variants reflect  
431 stochastic microheterogeneity, and they typically disappeared from bacterial populations after Day  
432 1 of selective outgrowth in the morbidostat (see **Supplementary Table S2D, S2E**).

433 A technical challenge originated from a tendency of *P. aeruginosa* to form a visible biofilm on the  
434 glass surface of the reactor, especially located near the interface with air. This problem was  
435 mitigated by keeping culture densities well within logarithmic growth phase ( $OD_{600} \leq 0.55$ ) and  
436 by daily transfer of cultures to clean reactors, which was performed along with sample collection.  
437 Using an improved version of morbidostat software allowed us to perform two evolutionary runs  
438 with more flexible iterative modulation of drug concentration during the runs. The second run  
439 (PAC-2) employed a shallower drug escalation mode in the early stage (Days 1-3) and enhanced  
440 the overall duration of the experiment (6 days instead of 4 days in PAC-1) with a larger number  
441 of collected and analyzed samples (**Supplementary Figure S4D,E**). In contrast to the case of *E.*  
442 *coli*, varying critical parameters of morbidostat runs with *P. aeruginosa* appeared to have some  
443 notable impacts on the range and dynamics of acquisition of certain mutational variants as outlined  
444 below (**Figure 2e,f, Supplementary Figure S4D,E**).

445 The most prominent primary mutation appearing in all reactors of both the PAC-1 and PAC-2 runs  
446 was the GyrA:Thr83Ile variant (**Table 1**), which is equivalent to GyrA:Ser83Leu in *E. coli* and  
447 Ser81Leu in *A. baumannii*. This was the only GyrA variant in the PAC-2 run, and it emerged

448 typically on Day 2 (in four out of six reactors) and expanded up to ~100% of population by Day  
449 3-4 in all reactors. The same GyrA:Thr83Ile variant was also universally present and dominant in  
450 all six reactors of the PAC-1 run. However, it appeared at a somewhat later stage (typically on Day  
451 3), in most cases after disruptive mutations in the *nfxB* gene (see below). Additional variants,  
452 GyrA:Asp87Asn and GyrA:Asp87Tyr, appeared in two reactors of the PAC-1 run and partially  
453 outcompeted the GyrA:Thr83Ile variant by the end of the run (**Figure 2e,f, Supplementary**  
454 **Figure S4D,E**). Two of these three variants (GyrA:Thr83Ile and GyrA:Asp87Asn) represent the  
455 two most commonly mutated positions in CIP-resistant *P. aeruginosa* reported for both clinical  
456 and laboratory isolates (68, 69).

457 The only prominent GyrB:Ser466Phe variant (equivalent of the GyrB:Ser464Phe variant observed  
458 in *E. coli*) was detected transiently in one reactor in each run (R6 of PAC-1 and R5 of PAC-2),  
459 peaking at 30% and 63% of respective populations only to be entirely outcompeted by  
460 GyrA:Thr83Ile-containing variants by the end of both runs.

461 Among the most striking differences observed between the two runs was the appearance of  
462 mutations in the genes *parC* and *parE* encoding both subunits A and B of DNA topoisomerase IV  
463 exclusively in PAC-2. Remarkably, the most prominent ParC:Ser87Leu variant appeared in all six  
464 reactors on the last day of the run when the drug concentration was highest, reaching up to 53% in  
465 population as a secondary mutation on the background of GyrA:Thr83Ile-containing variants  
466 (**Figure 2f, Supplementary Figure S4E**). Among more diverse (albeit less universal) ParE  
467 variants, the most prominent were ParE:Val460Gly and ParE:Ser457Cys, both reaching the highest  
468 abundance (34% and 17%, respectively) in the same reactor (R6) on the last day of the PAC-2 run  
469 (**Figure 2f**). These exhibited the same general evolutionary dynamics as ParC variants, and also  
470 emerged on the background of the GyrA:Thr83Ile variant (**Figure 2f**).

471 Among the mutational variants driving efflux upregulation, the most common and abundant were  
472 various types of disruptive mutations in the *nfxB* gene encoding a transcriptional repressor of the  
473 *mexCD–oprJ* operon (70, 71)(**Figure 4e,f**). Disruptive mutations in the *nfxB* gene were reported  
474 to have pleiotropic effects improving fitness and antibiotic resistance, contributing to lowered  
475 expression of outer membrane porins and improved drug efflux (72, 73). In our study, the entire  
476 range of 61 mutations unambiguously leading to a loss of function (frameshifts, nonsense  
477 mutations, and indels) and 8 missense mutations were found spread over all 12 reactors in both  
478 PAC runs collectively reaching from 35% to 90% abundance in at least one time point in every  
479 reactor (**Supplementary Figures S4D,E**). However, the dynamics of their appearance and  
480 accumulation was strikingly different between the two runs. Indeed, in nearly all reactors of the  
481 PAC-2 run (except R3), these mutations emerged and accumulated after or together with the  
482 driving GyrA:Thr83Ile variant, similar to the evolutionary dynamics patterns observed for *E. coli*  
483 and *A. baumannii*. In contrast, in all reactors of the PAC-1 run, NfxB mutational variants reached  
484 > 30% overall abundance prior to comparable accumulations of GyrA variants that emerged later  
485 and expanded on the background of NfxB and/or other adaptive mutations (**Supplementary**  
486 **Figure S4D, Supplementary Table S2D**). This observation provides another example of how the  
487 difference in drug escalation regimen may affect evolutionary trajectories of CIP-resistance in *P.*  
488 *aeruginosa*.

489 Most of the individual NfxB disruptive variants in the PAC-2 run were present at relatively low  
490 frequency (2 – 20%) and randomly distributed among reactors. Remarkably, one NfxB variant, a  
491 substitution of the stop codon by a cysteine codon, which resulted in extension of the NfxB protein  
492 by 68 amino acids, appeared in all six reactors on the background of the GyrA:Thr83Ile variant,  
493 peaking at up to 85% abundance in population (**Supplementary Table S2E**). In every case, the



494 abundance of this variant shrank to <20% on the last day of the run. This mutation was  
495 characterized earlier and found to lead to substantial overexpression of the MexCD-OprJ efflux  
496 pump (74). A similar, but less contrasted picture was observed in the course of the PAC-1 run in  
497 which the same variant appeared transiently in the middle of the run in five out of six reactors  
498 reaching 10-20% abundance, after which it completely disappeared from populations by the end  
499 of the run (**Supplementary Table S2D**). The single most abundant disruptive NfxB:Ile65fs variant  
500 reached >80% frequency in population and sustained until the end of the run, coupling with at least  
501 two out of three GyrA variants that emerged in this reactor (R5) only on the last day of PAC-1 run.  
502 Additional low frequency mutations potentially upregulating another multidrug efflux pump  
503 MexEF-OprN (75) were detected in the upstream region of the respective operon (typically at a  
504 later stage, see **Supplementary Table S2D, S2E**). One of these was a missense mutation  
505 (Gly258Asp), and two were intergenic mutations in the upstream region of the gene *mexT* encoding  
506 its transcriptional activator (**Figure 4c**). However, the largest variety of mutations reaching up to  
507 85% in all but one reactor in PAC-1 (and one reactor in PAC-2) were found within the coding  
508 sequence of a gene encoding an uncharacterized oxidoreductase MexS located in the divergon with  
509 MexT, immediately upstream of *mexE*, the first gene of the *mexEF-oprN* operon (**Figure 4c**). It  
510 was previously shown that a transposon inactivation of the *mexS* gene leads to upregulation of this  
511 typically quiescent operon via a yet unknown mechanism (76). Single amino acid substitutions in  
512 MexS leading to MexT-driven activation of the *mexEF-oprN* operon are frequently found in  
513 clinically isolated *nfxC* mutants of *P. aeruginosa* (a general term for strains with upregulated  
514 MexEF-OprN efflux pump) displaying enhanced virulence and drug resistance (77). Both  
515 MexCD-OprJ and MexEF-OprN systems affected in this study are known to be primary drivers



516 of fluoroquinolone resistance; no mutations were found in several other known efflux systems of  
517 *P. aeruginosa* (78).

518 The last type of frequent mutations (including frameshifts, indels, and IS inserts) was observed at  
519 the late stage of both PAC-1 and PAC-2 evolutionary runs in several *pil* genes involved in Type  
520 IV pilus and fimbria biogenesis/assembly (**Table 1, Supplementary Table 2D,E**). Some of these  
521 mutations expanded to high abundance when coupled with GyrA mutational variants, e.g. up to  
522 88% for PilQ:Gln232fs (R1 in PAC-1) and 65% for PilS:Gln14fs (R4 in PAC-2). Notably, a mutant  
523 variant PilW:Ala164fs appeared (in R5 of PAC-1) on Day 2 on the background of the  
524 NfxB:Leu62fs variant (in the absence of any GyrA/B mutations). The double mutant  
525 NfxB:Leu62fs/PilW:Ala164fs expanded to ~85% of the population on Day 3 and provided a  
526 genetic background for the appearance of the three GyrA mutant variants on Day 4 (**Figure 2c,**  
527 **Supplementary Table 2D**). The loss of type IV pili has been observed previously under CIP stress  
528 in *P. aeruginosa* (79). While the mechanistic rationale for this class of events remains unclear, it  
529 was hypothesized that the loss of type IV pili, known receptors for filamentous phages implicated  
530 in chronic infection, contributes to resistance against superinfection and lysis under ciprofloxacin  
531 stress (80).

532 The analysis of representative clones selected from PAC-1 confirmed the existence of CIP-  
533 resistant NfxB mutational variants lacking target-based mutations. Such clones exhibited about 8-  
534 fold increase in MIC. A combination of target-based (GyrA/GyrB) mutations combined with the  
535 loss of NfxB and/or other adaptive mutations discussed above increased the CIP-resistance up to  
536 16–32-fold MIC as compared to the unevolved strain (**Supplementary Table S3C**). Given the  
537 observed complexity of *P. aeruginosa*'s pathways to CIP resistance, establishing the actual  
538 contribution and mechanistic effects of individual mutations would require additional studies.

539 Another distinctive feature observed in experimental evolution of *P. aeruginosa* was the  
540 emergence of disruptive mutations in *mutS* and *mutL* genes encoding DNA mismatch repair  
541 proteins. The appearance of MutS frameshift variants in R5 at the very end of PAC-1 run coincided  
542 with a spike of mutations in the same abundance range (**Supplementary Table 2D**). More  
543 remarkable is a simultaneous occurrence of both mutational variants, MutS: Ala358fs (27%) and  
544 MutL:Leu706Arg (31%), in the same reactor (R4) on the last day of PAC-2 run. Despite similar  
545 abundances, these two variants likely represent two distinct clonal sub-populations, each  
546 accompanied by a broad range of secondary mutations (**Supplementary Table S2E**). Most of the  
547 accompanying secondary mutations did not occur at any other time points or in any other reactor.  
548 Loss of MutS function is known to increase the frequency of DNA replication errors leading to an  
549 explosion of mutations as demonstrated in many bacteria including *P. aeruginosa* (81). While  
550 limited to a single reactor per run, such a trajectory is not uncommon for *P. aeruginosa*, which  
551 was reported to acquire *mutS* loss-of-function mutations in cystic fibrosis patients possibly  
552 accelerating adaptation to the host environment and acquisition of antibiotic resistance (82). That  
553 said, the actual impact of *mutS/mutL* disruption on evolution of CIP resistance in our studies is not  
554 obvious. As already mentioned, MutS and MutL variants appeared only on the last day of each  
555 evolutionary experiment, whereas multiple co-appearing mutations seemed unrelated to drug  
556 resistance. Based on the abundance, only the GyrA:Asp87Asn variant (17%), which also emerged  
557 in R5 at the last time point of PAC-1 run, could have co-appeared on the background of the  
558 MutS:Arg302fs variant. However, even if confirmed by isolation of a corresponding double  
559 mutant (not accomplished in this work), this single event would not provide sufficient evidence of  
560 the hypothesized importance of a hypermutability phenotype to evolution of CIP resistance in *P.*  
561 *aeruginosa* which readily occurred in our study without any *mutS/mutL* disruption.

562

563 ***Comparative resistomics: shared and unique features of evolutionary trajectories to CIP***  
564 ***resistance in *E. coli*, *A. baumannii*, and *P. aeruginosa****

565 The present experimental evolution studies provided a foundation for comparative resistomics  
566 analysis of three representative Gram-negative bacterial species. Observation of each species in  
567 standardized continuous culturing conditions permitted discernment of common and species-  
568 specific aspects of evolutionary trajectories toward CIP resistance (**Figure 5**). The observed  
569 variety of these evolutionary trajectories can be approximated by a largely shared two-stage  
570 process. In Stage I, when the drug pressure was moderate (typically Day 1-3 of the morbidostat  
571 run), the emerging resistance (typically 4-16-fold MIC of unevolved parental strain) was usually  
572 driven by a single mutation rapidly expanding over the entire bacterial population in each reactor  
573 (**Figure 1c-e, Supplementary Figure S2**). In all reactors of *E. coli* (CEC-2 and CEC-4), *A.*  
574 *baumannii* (CAB-1), and one of the two morbidostat runs of *P. aeruginosa* (PAC-2), the earliest  
575 (Stage I) mutations occurred in one of the two subunits of DNA gyrase (GyrA or GyrB). Among  
576 them, the most prominent and sustainable were amino acid substitutions in two positions of GyrA:  
577 Ser/Thr83 or Asp87 (by numeration of *E. coli* GyrA). At least one of these GyrA variants  
578 ultimately appeared in nearly all reactors expanding up to 100% abundance by the end of each run  
579 (**Table 1, Supplementary Table S2A-E**). Not surprisingly, these amino acid residues located in  
580 the CIP binding site (**Figure 3**) are the positions of the most common mutations in CIP-resistant  
581 clinical isolates (10, 44). Of these two positions, the former was the only one affected in *A.*  
582 *baumannii* (5 out of 5 reactors), and the most universal (in 12 out of 12 reactors) among the two  
583 affected positions in *P. aeruginosa* GyrA in our study. Amino acid substitutions at this position  
584 were shown to substantially reduce drug binding to the GyrAB:DNA complex (83) and thus confer

585 a higher increase in MIC compared to other *gyrA* mutations (48). Notably, the GyrA:Ser83Leu  
586 variant appeared in only one out of 10 reactors of *E. coli* runs (**Table 1**), while most other reactors  
587 were dominated by GyrA:Asp87(Tyr, Gly, or Asn) variants.

588 Another distinctive feature of evolution of CIP resistance in *E. coli* was a somewhat unexpected  
589 prominence of GyrB mutational variants. Thus, GyrB:Ser464Phe and GyrB:Ser464Tyr emerged  
590 as the earliest Stage I variants in all 6 reactors of CEC-2 and all 4 reactors of CEC-4 (**Table 1**,  
591 **Supplementary Figure S4AB**). Moreover, they sustained their predominant abundance until the  
592 end of both runs in 7 out of 10 reactors via coupling with efflux-deregulating mutations in Stage  
593 II. While GyrB is not considered a direct target of fluoroquinolones; the affected Ser464 position  
594 is located close to the CIP binding site in the GyrA:GyrB complex (**Figure 3**)(84). Further, CIP  
595 resistance-conferring mutations in this position were previously reported in *Citrobacter freundii*,  
596 *Morganella morganii*, *Salmonella typhimurium*, and *P. aeruginosa* (85-88). Notably, no GyrB  
597 variants were observed in *A. baumannii*, and a position-equivalent GyrB:Ser466Phe variant  
598 appeared only transiently in *P. aeruginosa* morbidostat runs (**Table 1**, **Supplementary Figure**  
599 **S4DE**).

600 Important similarities along with interesting differences can be deduced from the comparative  
601 analysis of mutational profiles of these three bacterial species with respect to a known secondary  
602 target of fluoroquinolones, DNA topoisomerase IV, comprised of two subunits (ParC and ParE).  
603 In contrast to *A. baumannii* and *P. aeruginosa*, no mutations were detected in *parC* or *parE* genes  
604 in either one of the two *E. coli* morbidostat runs (**Table 1**). Moreover, even in the other two species,  
605 such mutations were relatively rare and occurred exclusively in Stage II on the background of  
606 Stage I-born GyrA mutations (**Supplementary Figure S4C-E**). An interesting difference between  
607 these species is that while *A. baumannii* featured only ParC variants, the second *P. aeruginosa*

608 morbidostat run (PAC-2, but not PAC-1) revealed a substantial representation of both ParC and  
609 ParE variants (Table 1). Despite a clear distinction of mutational profiles and frequencies between  
610 the primary (GyrA/B) and secondary (ParC/E) CIP targets, the complete lack of ParC/E mutational  
611 variants in evolutionary experiments with *E. coli* is somewhat surprising given the reported  
612 presence of such mutations in ciprofloxacin-resistant clinical isolates of *E. coli* (67, 89). A rationale  
613 behind this single discrepancy between otherwise fully overlapping spectra of CIP target-directed  
614 mutations observed in morbidostat setting vs clinical isolates is unclear.

615 In addition to a narrow set of missense mutations in universal target genes, numerous different but  
616 mostly disruptive mutations emerged in a variety of efflux-regulating genes in all three species  
617 examined (Table 1, Figure 4). Among the common features of these mutational events: (i) they  
618 typically occurred in Stage II on the background of already accumulated GyrA/B variants, the  
619 universal evolutionary trajectory in *E. coli* and *A. baumannii* and predominant one in *P.*  
620 *aeruginosa*, and (ii) the most common targets of these mutations in all three species were negative  
621 regulators (transcriptional repressors) of efflux pump operons. Not surprisingly, a large fraction of  
622 such mutations includes nonsense mutations (stops), frameshifts, small indels, and IS insertions  
623 (Figure 4) representing a clear loss-of-function. Notably, the last of these was the most common,  
624 if not the only type of genetic alteration leading to loss of gene function in *A. baumannii*. In *E.*  
625 *coli*, IS insertions comprised more than half of the loss-of-function variants of negative efflux  
626 regulator AcrR (but not MarR or SoxR) and two intergenic variants potentially leading to  
627 derepression of the positive efflux regulator SoxS. Less frequent mutational events with the same  
628 type of downstream effects (upregulation of efflux pumps) occurred in intergenic regions (possible  
629 binding sites of respective transcriptional regulators). Additionally, several exclusively missense  
630 mutations arose in positive regulators (AdeS in *A. baumannii* and MexT in *P. aeruginosa*).

631 A notable deviation from the nearly universal evolutionary trajectory (target first, efflux later) was  
632 observed in *P. aeruginosa* for NfxB, a transcriptional repressor of the *mexCD-oprJ* efflux operon.  
633 NfxB-inactivating mutations emerged in both Stage I (in the absence of any target mutations; in  
634 PAC-1 but not in PAC-2) and Stage II of CIP resistance evolution in *P. aeruginosa*.  
635 All major types of CIP resistance-conferring mutations described in the literature were observed  
636 in at least one of the three species in our study. These results support the utility of the established  
637 morbidostat-based workflow to elucidate antibiotic resistance mechanisms in a comprehensive  
638 manner. Strengthened further by a comparative resistomics approach, this study allowed us to  
639 elucidate and generalize major pathways to CIP-resistance in a group of divergent Gram-negative  
640 bacterial pathogens.

641

## 642 **Concluding remarks**

643 We employed a comparative dynamic analysis of genetic adaptation to reveal both shared and  
644 distinctive features of three divergent Gram-negative bacterial species' evolutionary trajectories  
645 towards CIP resistance. Despite obvious differences between the experimental conditions in the  
646 morbidostat and the complexity of processes leading to drug resistance in bacterial infections, the  
647 results obtained in this study are generally consistent with those deduced from clinical CIP-  
648 resistant isolates.

649 Many studies have suggested that resistance mutations observed in clinical specimens are biased  
650 toward low fitness costs, as fitness may be more important than the extent of resistance in clinical  
651 conditions (10, 55, 90). This observation is perhaps best exemplified by the apparent bias against  
652 inactivation in *marR* mutations in ciprofloxacin-resistant isolates. The interplay of fitness and  
653 resistance may explain the general mutation dynamics observed in this study. An initial emergence

654 of rare target mutations with a presumably low fitness-cost occurred in the morbidostat similar to  
655 what is observed in the clinic. This was followed by an explosion of various efflux-regulator  
656 mutations later in the evolutionary trajectory as high drug resistance became the primary hurdle,  
657 and additional adaptation mechanisms had to be engaged for survival (10). Especially in human  
658 infection, early selection appears to favor the mutation causing the lowest fitness detriment, even  
659 when the resulting increase in resistance is relatively modest (55).

660 Indeed, disruptive mutations observed abundantly in efflux regulator genes in our study are  
661 statistically much more likely to occur than a few beneficial amino acid substitutions in a very  
662 limited set of positions in CIP target enzymes. And yet, such mutations were mostly observed as  
663 secondary events at a later stage (Stage II) of experimental evolution in the morbidostat. This is  
664 consistent with the observations that these mutations in clinical CIP resistant isolates also appear  
665 only in addition to target-directed mutations, likely due to relatively higher fitness costs. This  
666 overall consistency with data from clinical isolates is possibly driven by a relatively large bacterial  
667 population sizes maintained in the morbidostat setup, along with continuous competition at the  
668 level of growth rate (fitness) imposed by frequent dilutions. In contrast, more traditional  
669 experimental approaches are constrained by population-limiting bottlenecks which cause minimal  
670 competition and contribute to the selection of low fitness variants (23).

671 *Overall*, this study (as well as other similar studies (26-28, 91) confirms that morbidostat-based  
672 experimental evolution provides a powerful approach to assess the dynamics and mechanisms of  
673 antimicrobial resistance acquisition in a broad range of pathogens. This methodology is scalable  
674 and applicable for known antibiotics as well as novel drug candidates. The utility of comparative  
675 resistomics to assess and triage drug candidates across a range of target pathogens is expected to  
676 manifest even in the early phase of antimicrobial drug development. Combined with standard

677 efficacy and safety evaluation, such assessment would contribute to the rational selection of  
678 compounds capable of providing lasting therapies in the field for longer periods of use.

679

## 680 **Acknowledgements**

681 This work was supported by F. Hoffmann-La Roche Ltd pRED postdoctoral fellowship to S.L.  
682 and by Laboratory Funding Initiative of SBP to A.O.

683

### 684 **For reviewers:**

685 1) The sequencing data for population and clonal sequencing is available in NCBI SRA  
686 database through the reviewers login

687 ([https://dataview.ncbi.nlm.nih.gov/object/PRJNA598012?reviewer=ssd6539aliv2i9m8qs](https://dataview.ncbi.nlm.nih.gov/object/PRJNA598012?reviewer=ssd6539aliv2i9m8qs8g6qsc5k)  
688 [8g6qsc5k](https://dataview.ncbi.nlm.nih.gov/object/PRJNA598012?reviewer=ssd6539aliv2i9m8qs8g6qsc5k))

689 2) The manuscript “Experimental evolution in morbidostat reveals converging genomic  
690 trajectories on the path to triclosan resistance” by S. Leyn *et al.* that was accepted but not  
691 yet published is available by the following link:

692 [https://16515-](https://16515-my.sharepoint.com/:u:/g/personal/sleyn_sbpdiscovery_org/ERMAw0tAs8xPpOoRrhoGlF4Ba_bObjanBCr4oUSyAuxvag?e=IaBeLJ)  
693 [my.sharepoint.com/:u:/g/personal/sleyn\\_sbpdiscovery\\_org/ERMAw0tAs8xPpOoRrhoGl](https://16515-my.sharepoint.com/:u:/g/personal/sleyn_sbpdiscovery_org/ERMAw0tAs8xPpOoRrhoGlF4Ba_bObjanBCr4oUSyAuxvag?e=IaBeLJ)  
694 [F4Ba\\_bObjanBCr4oUSyAuxvag?e=IaBeLJ](https://16515-my.sharepoint.com/:u:/g/personal/sleyn_sbpdiscovery_org/ERMAw0tAs8xPpOoRrhoGlF4Ba_bObjanBCr4oUSyAuxvag?e=IaBeLJ)

695



696  
697

**Table 1. Major mutational variants detected in the course of experimental evolution of ciprofloxacin resistance<sup>a</sup>**

| <i>E. coli</i>                          |                             |                         | <i>A. baumannii</i>      |                             |                        | <i>P.aeruginosa</i>              |                             |                         |
|-----------------------------------------|-----------------------------|-------------------------|--------------------------|-----------------------------|------------------------|----------------------------------|-----------------------------|-------------------------|
| Variant                                 | Max. Freq. (%) <sup>b</sup> | In reactors (out of 10) | Variant                  | Max. Freq. (%) <sup>b</sup> | In reactors (out of 5) | Variant                          | Max. Freq. (%) <sup>b</sup> | In reactors (out of 12) |
| <b>Primary targets</b>                  |                             |                         |                          |                             |                        |                                  |                             |                         |
| <b>GyrA, DNA gyrase subunit A</b>       |                             |                         |                          |                             |                        |                                  |                             |                         |
| Ser83Leu                                | 98%                         | 1                       | Ser81Leu                 | 99%                         | 5                      | Thr83Ile                         | 100%                        | 12                      |
| Asp87Asn                                | 17%                         | 1                       |                          |                             |                        | Asp87Asn                         | 79%                         | 2                       |
| Asp87Tyr                                | 99%                         | 4                       |                          |                             |                        | Asp87Tyr                         | 52%                         | 1                       |
| Asp87Gly                                | 74%                         | 6                       |                          |                             |                        |                                  |                             |                         |
| Ala119Glu                               | 7%                          | 2                       |                          |                             |                        |                                  |                             |                         |
| <b>GyrB, DNA gyrase subunit B</b>       |                             |                         |                          |                             |                        |                                  |                             |                         |
|                                         |                             |                         |                          |                             |                        | Leu128Pro                        | 7%                          | 1                       |
| Ser464Phe                               | 96%                         | 6                       |                          |                             |                        | Ser466Phe                        | 63%                         | 4                       |
| Ser464Tyr                               | 99%                         | 4                       |                          |                             |                        |                                  |                             |                         |
| <b>Secondary targets</b>                |                             |                         |                          |                             |                        |                                  |                             |                         |
| <b>ParC, Topoisomerase IV subunit A</b> |                             |                         |                          |                             |                        |                                  |                             |                         |
|                                         |                             |                         | Ser84Leu                 | 36%                         | 4                      | Ser87Leu                         | 53%                         | 6                       |
|                                         |                             |                         | Glu88Lys                 | 86%                         | 2                      |                                  |                             |                         |
|                                         |                             |                         | Asn334Tyr                | 4%                          | 1                      |                                  |                             |                         |
| <b>ParE, Topoisomerase IV subunit B</b> |                             |                         |                          |                             |                        |                                  |                             |                         |
|                                         |                             |                         |                          |                             |                        | Leu121Pro                        | 8%                          | 1                       |
|                                         |                             |                         |                          |                             |                        | Ser457Gly                        | 6%                          | 1                       |
|                                         |                             |                         |                          |                             |                        | Ser457Cys                        | 17%                         | 1                       |
|                                         |                             |                         |                          |                             |                        | Ser457_insArg                    | 9%                          | 1                       |
|                                         |                             |                         |                          |                             |                        | Val460Gly                        | 62%                         | 2                       |
| <b>Efflux pump deregulation</b>         |                             |                         |                          |                             |                        |                                  |                             |                         |
| <i>marR</i> <sup>c</sup>                | 86%                         | 9                       | <i>adeN</i> <sup>c</sup> | 28%                         | 5                      | <i>nfxB</i> <sup>c</sup>         | 90%                         | 12                      |
| <i>soxR</i> <sup>c</sup>                | 95%                         | 9                       | <i>adeS</i> <sup>c</sup> | 72%                         | 4                      | <i>us_mexE</i>                   | 39%                         | 1                       |
| <i>us_soxS</i>                          | 10%                         | 2                       | <i>us_adel</i>           | 36%                         | 4                      | <i>us_mexT</i>                   | 12%                         | 5                       |
| <i>acrR</i> <sup>c</sup>                | 63%                         | 9                       |                          |                             |                        | <i>mexT:G58D</i>                 | 6%                          | 1                       |
| <i>us_acrA</i>                          | 53%                         | 3                       |                          |                             |                        | <i>mexS</i> <sup>c</sup>         | 94%                         | 7                       |
| <b>Other strongly implicated genes</b>  |                             |                         |                          |                             |                        |                                  |                             |                         |
|                                         |                             |                         |                          |                             |                        | <i>pilBOPQRSTWZ</i> <sup>c</sup> | 98%                         | 11                      |
|                                         |                             |                         |                          |                             |                        | <i>mutL</i> <sup>c</sup>         | 37%                         | 2                       |
|                                         |                             |                         |                          |                             |                        | <i>mutS</i> <sup>c</sup>         | 27%                         | 3                       |

698 <sup>a</sup>Listed mutations that reached  $\geq 5\%$  in at least in one reactor and one time point.

699 <sup>b</sup>Maximum observed frequency reached at any time point in any reactor.

700 <sup>c</sup>Disruptive mutations (mainly frameshifts, stops, small indels and IS inserts).

701

702

## FIGURE LEGENDS

703 **Figure 1. Morbidostat design (a), control logics (b) and examples of evolutionary runs of *E.***

704 ***coli* (c), *A. baumannii* (d) and *P. aeruginosa* (e) with ciprofloxacin. a.** Bacterial populations are

705 continuously cultured in a 20 mL glass tube (bioreactor) with magnetic stirring and three input

706 lines: filtered air (blue) and media from two feed bottles, with and without a concentrated drug

707 (red and green, respectively). The growth (turbidity) is monitored using a laser beam and diode

708 light sensor. Upon periodic addition of 2-4 mL media from the first or the second feed bottle (as

709 defined by control logic, see B), the excess volume is displaced by air flow into a waste bottle.

710 Samples (up to 10 mL) are taken periodically (1-2 times per day) through a dedicated sampling

711 port. Our current morbidostat implementation includes 6 parallel bioreactors with individual feed

712 lines that are independently monitored and controlled by the Arduino board with Windows PC-

713 based user interface.

714 **b.** Morbidostat logic is controlled by an Arduino board based on the principles described by Toprak

715 et al. (27) using the real-time OD input from each bioreactor and predefined run parameters: lower

716 threshold (LT), drug threshold (DT), and cycle time (time between dilutions, typically 10 - 20 min

717 when  $OD > LT$ ). Depending on the conditions shown in the diagram, one of the two peristaltic

718 pumps (feeding media with or without drug) are engaged at the beginning of each dilution-

719 outgrowth cycle.

720 **c-e.** Representative OD profiles (black line) and calculated drug concentration profiles (red line)

721 observed in the course of experimental evolution of *E. coli*, *A. baumannii*, and *P. aeruginosa*

722 toward resistance against ciprofloxacin (CIP). One of the reactors is shown for each organism,

723 while evolutionary profiles for all other experiments and reactors are provided in Supplementary  
724 Figure 2. The right axis shows CIP concentration (xMIC) as fold-change relative to MIC value of  
725 respective unevolved strains.

726

727 **Figure 2. Population dynamics of experimental evolution of ciprofloxacin resistance in *E. coli***  
728 **(a, b), *A. baumannii* (c, d), and *P. aeruginosa* (e, f).** Frequency of major mutations (reaching  
729  $\geq 5\%$ ) in evolving bacterial populations is shown as function of time for selected reactors. Selected  
730 reactors are shown: a) reactor 4 from CEC-2; b) reactor 5 from CEC-4; c) reactor 5 from CAB; d)  
731 reactor 6 from CAB; e) reactor 5 from PAC-1; f) reactor 6 from PAC-2.

732

733 **Figure 3. Amino acid substitutions in GyrA (pink chain)/GyrB (blue chain) observed in the**  
734 **course of morbidostat-based experimental evolution of CIP resistance in *E. coli* (red font),**  
735 ***A. baumannii* (blue font), and *P. aeruginosa* (green font) mapped on 3D structure [PDB:**  
736 **6RKW].** The ciprofloxacin molecule (blue) and Mg<sup>2+</sup> ion (green) were added by structural  
737 alignment of 6RKW with the structure of Mycobacterium tuberculosis gyrase bound to CIP  
738 (PDB:5BTC). The substitution equivalent to *P. aeruginosa* GyrB:Leu128Pro is not shown. It is  
739 located in proximity to the ATP-binding site of GyrB. Chain A of 6RKW was aligned to chain A  
740 of 5BTC using FATCAT. The same rotation-translation was then applied to all chains in 6RKW  
741 to align the full structure.

742

743 **Figure 4. Mutations leading to upregulation of efflux machinery in *Escherichia coli* (a),**  
744 ***Acinetobacter baumannii* (b), and *Pseudomonas aeruginosa* (c) detected over the course of**  
745 **experimental evolution of CIP resistance.** The total number of distinct variants detected in at

746 least one of the reactors is shown under the color-coded upward triangles indicating a type of  
747 mutation

748

749 **Figure 5. Trajectories and stages in the experimental evolution of CIP resistance in *E. coli*,**  
750 ***A. baumannii*, and *P. aeruginosa*.** Major driver mutations are shown in color-coded boxes:  
751 missense mutations in targets (green and blue); disruptive mutations in efflux regulators (yellow  
752 and brown). Additional potentially relevant mutations detected in populations but not in isolated  
753 clones are shown on a grey background.

754

#### 755 LIST OF SUPPLEMENTARY TABLES

756 **Supplementary Table S1.** Read alignments in the genomes of *E. coli*, *A. baumannii*, and *P.*  
757 *aeruginosa*.

758 “S1A” = Supplementary Table S1A. Read alignment statistics for population samples.

759 “S1B” = Supplementary Table S1B. Read alignment statistics for clonal samples.

760 “S1C” = Supplementary Table S1C. Genes comprising a mapped large deletion in *A.*  
761 *baumannii* ATCC 17978 chromosome

762

763 **Supplementary Table S2.** Observed sequence variants (mutations, small indels, and IS elements  
764 insertions in the population samples collected and analyzed from five evolutionary runs.

765 S2A = Supplementary Table S2A. Sequence variants (nonsynonymous) and their  
766 dynamics in evolving populations of *E. coli* BW25113 (run CEC-2)

767 S2B = Supplementary Table S2B. Sequence variants (nonsynonymous) and their  
768 dynamics in evolving populations of *E. coli* BW25113 (run CEC-4)

769 S2C = Supplementary Table S2C. Sequence variants (nonsynonymous) and their  
770 dynamics in evolving populations of *A. baumannii* 17978 (run CAB-1)

771 S2D= Supplementary Table S2D. Sequence variants (nonsynonymous) and their  
772 dynamics in evolving populations of *P. aeruginosa* (run PAC-1)

773 S2E= Supplementary Table S2E. Sequence variants (nonsynonymous) and their  
774 dynamics in evolving populations of *P. aeruginosa* (run PAC-2)

775

776 **Supplementary Table S3.** Observed acquired sequence variants and MIC values in selected  
777 clones.

778 S3A= Supplementary Table S3A. Sequence variants and MIC values in selected clones  
779 from the two evolutionary runs of *E. coli* BW25113 (CEC-2 and CEC-4)

780 S3B = Supplementary Table S3B. Sequence variants and MIC values in selected clones  
781 from the evolutionary run of *A. baumannii* ATCC17978 (CAB)

782 S3C =Supplementary Table S3C. Sequence variants (from directed PCR analysis) and  
783 MIC values in selected clones from the evolutionary run of *P. aeruginosa* ATCC27853  
784 (PAC-1)

785  
786  
787

## LEGENDS FOR SUPPLEMENTARY FIGURES

788 **Supplementary Figure S1. Morbidostat-based experimental evolution workflow.** The initial  
789 unevolved culture (1) is plated on the agar Petri dish (2) to make individual colonies. The  
790 colonies are collected (3) and used to make 6 inoculates (4) – one colony for each reactor for  
791 morbidostat cultivation (5). From each reactor samples are taken roughly once in 24 hours (6).  
792 To observe population dynamics (8) we perform WGS with high coverage for each sample (7).  
793 The population dynamics is used to choose optimal number of colonies from plated evolved  
794 samples (9). For each colony we do WGS (10, 11) and MIC tests (12) that reveals genotype-  
795 phenotype association.

796 **Supplementary Figure S2.** OD profiles (black line) and calculated drug concentration profiles  
797 (red line) obtained in the course of experimental evolution of ciprofloxacin resistance in (A)  
798 *Escherichia coli* BW25113, CEC-2 run; (B) *Escherichia coli* BW25113, CEC-4 run; (C)  
799 *Acinetobacter baumannii* ATCC17978, CAB-1 run; (D) *Pseudomonas aeruginosa* ATCC27853,  
800 PAC-1 run; (E) *Pseudomonas aeruginosa* ATCC27853, PAC-2 run. The right axis shows CIP  
801 concentration (xMIC) as fold-change relative to MIC value of respective unevolved strains.  
802 Sequenced samples marked with arrows.

803

804 **Supplementary Figure 3. Computational pipeline for a primary analysis of population**  
805 **sequencing data.** Data shown in black hexagons. Processes and software shown in rectangles  
806 and rounded rectangles respectively. Frames indicate aims of the parts of the analysis.

807

808 **Supplementary Figure S4.** Population dynamics of experimental evolution of ciprofloxacin  
809 resistance in **(A)** *Escherichia coli* BW25113, CEC-2 run; **(B)** *Escherichia coli* BW25113, CEC-4  
810 run; **(C)** *Acinetobacter baumannii* ATCC17978, CAB-1 run; **(D)** *Pseudomonas aeruginosa*  
811 ATCC27853, PAC-1 run; **(E)** *Pseudomonas aeruginosa* ATCC27853, PAC-2 run. For each  
812 reactor in every morbidostat run, the frequency of major mutations (reaching  $\geq 5\%$ ) in evolving  
813 bacterial populations is shown as a function of time.

814

815

816

## 817 **References**

818

- 819 1. Torok E, Moran E, Cooke F. 2010. Oxford Handbook of Infectious Diseases and  
820 Microbiology doi:10.1016/j.trstmh.2009.11.002. Oxford University Press, Oxford.
- 821 2. Meesters K, Mauel R, Dhont E, Walle JV, De Bruyne P. 2018. Systemic fluoroquinolone  
822 prescriptions for hospitalized children in Belgium, results of a multicenter retrospective  
823 drug utilization study. *BMC Infect Dis* 18:89.
- 824 3. Pitout JD, Chan WW, Church DL. 2016. Tackling antimicrobial resistance in lower  
825 urinary tract infections: treatment options. *Expert Rev Anti Infect Ther* 14:621-32.
- 826 4. Chen CR, Malik M, Snyder M, Drlica K. 1996. DNA gyrase and topoisomerase IV on the  
827 bacterial chromosome: quinolone-induced DNA cleavage. *J Mol Biol* 258:627-37.
- 828 5. Drlica K, Malik M, Kerns RJ, Zhao X. 2008. Quinolone-mediated bacterial death.  
829 *Antimicrob Agents Chemother* 52:385-92.
- 830 6. Fabrega A, Madurga S, Giralt E, Vila J. 2009. Mechanism of action of and resistance to  
831 quinolones. *Microb Biotechnol* 2:40-61.
- 832 7. Hooper DC. 1999. Mode of action of fluoroquinolones. *Drugs* 58 Suppl 2:6-10.
- 833 8. Hooper DC. 2001. Mechanisms of action of antimicrobials: focus on fluoroquinolones.  
834 *Clin Infect Dis* 32 Suppl 1:S9-S15.
- 835 9. Gullberg E, Cao S, Berg OG, Ilback C, Sandegren L, Hughes D, Andersson DI. 2011.  
836 Selection of resistant bacteria at very low antibiotic concentrations. *PLoS Pathog*  
837 7:e1002158.
- 838 10. Huseby DL, Pietsch F, Brandis G, Garoff L, Tegehall A, Hughes D. 2017. Mutation  
839 Supply and Relative Fitness Shape the Genotypes of Ciprofloxacin-Resistant *Escherichia*  
840 *coli*. *Mol Biol Evol* 34:1029-1039.



- 841 11. Komp Lindgren P, Karlsson A, Hughes D. 2003. Mutation rate and evolution of  
842 fluoroquinolone resistance in *Escherichia coli* isolates from patients with urinary tract  
843 infections. *Antimicrobial agents and chemotherapy* 47:3222-3232.
- 844 12. Ruiz J. 2003. Mechanisms of resistance to quinolones: target alterations, decreased  
845 accumulation and DNA gyrase protection. *J Antimicrob Chemother* 51:1109-17.
- 846 13. Yoshida H, Bogaki M, Nakamura M, Nakamura S. 1990. Quinolone resistance-  
847 determining region in the DNA gyrase *gyrA* gene of *Escherichia coli*. *Antimicrob Agents*  
848 *Chemother* 34:1271-2.
- 849 14. Alekshun MN, Levy SB. 1997. Regulation of chromosomally mediated multiple  
850 antibiotic resistance: the *mar* regulon. *Antimicrob Agents Chemother* 41:2067-75.
- 851 15. Cohen SP, McMurry LM, Hooper DC, Wolfson JS, Levy SB. 1989. Cross-resistance to  
852 fluoroquinolones in multiple-antibiotic-resistant (Mar) *Escherichia coli* selected by  
853 tetracycline or chloramphenicol: decreased drug accumulation associated with membrane  
854 changes in addition to *OmpF* reduction. *Antimicrob Agents Chemother* 33:1318-25.
- 855 16. Hooper DC, Wolfson JS, Bozza MA, Ng EY. 1992. Genetics and Regulation of Outer  
856 Membrane Protein Expression by Quinolone Resistance Loci *nfxB*, *nfxC*, and *cfxB*.  
857 *Antimicrobial Agents and Chemotherapy* 36:1151-1154.
- 858 17. Okusu H, Ma D, Nikaido H. 1996. *AcrAB* efflux pump plays a major role in the  
859 antibiotic resistance phenotype of *Escherichia coli* multiple-antibiotic-resistance (Mar)  
860 mutants. *J Bacteriol* 178:306-8.
- 861 18. Wang H, Dzink-Fox JL, Chen M, Levy SB. 2001. Genetic characterization of highly  
862 fluoroquinolone-resistant clinical *Escherichia coli* strains from China: role of *acrR*  
863 mutations. *Antimicrob Agents Chemother* 45:1515-21.

- 864 19. Lee CR, Lee JH, Park M, Park KS, Bae IK, Kim YB, Cha CJ, Jeong BC, Lee SH. 2017.  
865 Biology of *Acinetobacter baumannii*: Pathogenesis, Antibiotic Resistance Mechanisms,  
866 and Prospective Treatment Options. *Front Cell Infect Microbiol* 7:55.
- 867 20. McConnell MJ, Actis L, Pachon J. 2013. *Acinetobacter baumannii*: human infections,  
868 factors contributing to pathogenesis and animal models. *FEMS Microbiol Rev* 37:130-55.
- 869 21. Park S, Lee KM, Yoo YS, Yoo JS, Yoo JI, Kim HS, Lee YS, Chung GT. 2011.  
870 Alterations of *gyrA*, *gyrB*, and *parC* and Activity of Efflux Pump in Fluoroquinolone-  
871 resistant *Acinetobacter baumannii*. *Osong Public Health Res Perspect* 2:164-70.
- 872 22. Rehman A, Patrick WM, Lamont IL. 2019. Mechanisms of ciprofloxacin resistance in  
873 *Pseudomonas aeruginosa*: new approaches to an old problem. *J Med Microbiol* 68:1-10.
- 874 23. Garoff L, Pietsch F, Huseby DL, Lilja T, Brandis G, Hughes D. 2020. Population  
875 Bottlenecks Strongly Influence the Evolutionary Trajectory to Fluoroquinolone  
876 Resistance in *Escherichia coli*. *Mol Biol Evol* 37:1637-1646.
- 877 24. Komp Lindgren P, Marcusson LL, Sandvang D, Frimodt-Moller N, Hughes D. 2005.  
878 Biological cost of single and multiple norfloxacin resistance mutations in *Escherichia coli*  
879 implicated in urinary tract infections. *Antimicrob Agents Chemother* 49:2343-51.
- 880 25. Zhao X, Drlica K. 2001. Restricting the selection of antibiotic-resistant mutants: a  
881 general strategy derived from fluoroquinolone studies. *Clin Infect Dis* 33 Suppl 3:S147-  
882 56.
- 883 26. Toprak E, Veres A, Michel JB, Chait R, Hartl DL, Kishony R. 2011. Evolutionary paths  
884 to antibiotic resistance under dynamically sustained drug selection. *Nat Genet* 44:101-5.

- 885 27. Toprak E, Veres A, Yildiz S, Pedraza JM, Chait R, Paulsson J, Kishony R. 2013.  
886 Building a morbidostat: an automated continuous-culture device for studying bacterial  
887 drug resistance under dynamically sustained drug inhibition. *Nat Protoc* 8:555-67.
- 888 28. Leyn SA, Zlamal JE, Kurnasov OV, Li X, Elane M, Myjak L, Godzik M, de Crecy A,  
889 Garcia FA, Ebeling M, Osterman AL. 2021. Experimental evolution in morbidostat  
890 reveals converging genomic trajectories on the path to triclosan resistance. *Microb*  
891 *Genom* In Press.
- 892 29. Andrews S. 2010. FastQC. A quality control tool for high throughput sequence data,  
893 Babraham Institute, <https://www.bioinformatics.babraham.ac.uk/projects/fastqc/>.
- 894 30. Bolger AM, Lohse M, Usadel B. 2014. Trimmomatic: a flexible trimmer for Illumina  
895 sequence data. *Bioinformatics* 30:2114-20.
- 896 31. Li H, Durbin R. 2009. Fast and accurate short read alignment with Burrows-Wheeler  
897 transform. *Bioinformatics* 25:1754-60.
- 898 32. Wilm A, Aw PP, Bertrand D, Yeo GH, Ong SH, Wong CH, Khor CC, Petric R, Hibberd  
899 ML, Nagarajan N. 2012. LoFreq: a sequence-quality aware, ultra-sensitive variant caller  
900 for uncovering cell-population heterogeneity from high-throughput sequencing datasets.  
901 *Nucleic Acids Res* 40:11189-201.
- 902 33. DePristo MA, Banks E, Poplin R, Garimella KV, Maguire JR, Hartl C, Philippakis AA,  
903 del Angel G, Rivas MA, Hanna M, McKenna A, Fennell TJ, Kernytzky AM, Sivachenko  
904 AY, Cibulskis K, Gabriel SB, Altshuler D, Daly MJ. 2011. A framework for variation  
905 discovery and genotyping using next-generation DNA sequencing data. *Nat Genet*  
906 43:491-8.

- 907 34. Siguier P, Perochon J, Lestrade L, Mahillon J, Chandler M. 2006. ISfinder: the reference  
908 centre for bacterial insertion sequences. *Nucleic Acids Res* 34:D32-6.
- 909 35. Cingolani P, Platts A, Wang le L, Coon M, Nguyen T, Wang L, Land SJ, Lu X, Ruden  
910 DM. 2012. A program for annotating and predicting the effects of single nucleotide  
911 polymorphisms, SnpEff: SNPs in the genome of *Drosophila melanogaster* strain w1118;  
912 iso-2; iso-3. *Fly (Austin)* 6:80-92.
- 913 36. Li H. 2011. A statistical framework for SNP calling, mutation discovery, association  
914 mapping and population genetical parameter estimation from sequencing data.  
915 *Bioinformatics* 27:2987-93.
- 916 37. Deatherage DE, Barrick JE. 2014. Identification of mutations in laboratory-evolved  
917 microbes from next-generation sequencing data using breseq. *Methods Mol Biol*  
918 1151:165-88.
- 919 38. Brynildsrud O, Snipen LG, Bohlin J. 2015. CNOGpro: detection and quantification of  
920 CNVs in prokaryotic whole-genome sequencing data. *Bioinformatics* 31:1708-15.
- 921 39. Kurtz S, Phillippy A, Delcher AL, Smoot M, Shumway M, Antonescu C, Salzberg SL.  
922 2004. Versatile and open software for comparing large genomes. *Genome Biol* 5:R12.
- 923 40. Bankevich A, Nurk S, Antipov D, Gurevich AA, Dvorkin M, Kulikov AS, Lesin VM,  
924 Nikolenko SI, Pham S, Prjibelski AD, Pyshkin AV, Sirotkin AV, Vyahhi N, Tesler G,  
925 Alekseyev MA, Pevzner PA. 2012. SPAdes: a new genome assembly algorithm and its  
926 applications to single-cell sequencing. *J Comput Biol* 19:455-77.
- 927 41. Brettin T, Davis JJ, Disz T, Edwards RA, Gerdes S, Olsen GJ, Olson R, Overbeek R,  
928 Parrello B, Pusch GD, Shukla M, Thomason JA, 3rd, Stevens R, Vonstein V, Wattam  
929 AR, Xia F. 2015. RASTtk: a modular and extensible implementation of the RAST

- 930 algorithm for building custom annotation pipelines and annotating batches of genomes.  
931 Sci Rep 5:8365.
- 932 42. EUCAST. 2000. EUCAST Definitive Document E.DEF 3.1, June 2000: Determination of  
933 minimum inhibitory concentrations (MICs) of antibacterial agents by agar dilution. Clin  
934 Microbiol Infect 6:509-15.
- 935 43. Davis JJ, Wattam AR, Aziz RK, Brettin T, Butler R, Butler RM, Chlenski P, Conrad N,  
936 Dickerman A, Dietrich EM, Gabbard JL, Gerdes S, Guard A, Kenyon RW, Machi D,  
937 Mao C, Murphy-Olson D, Nguyen M, Nordberg EK, Olsen GJ, Olson RD, Overbeek JC,  
938 Overbeek R, Parrello B, Pusch GD, Shukla M, Thomas C, VanOeffelen M, Vonstein V,  
939 Warren AS, Xia F, Xie D, Yoo H, Stevens R. 2020. The PATRIC Bioinformatics  
940 Resource Center: expanding data and analysis capabilities. Nucleic Acids Res 48:D606-  
941 D612.
- 942 44. Marcusson LL, Frimodt-Moller N, Hughes D. 2009. Interplay in the selection of  
943 fluoroquinolone resistance and bacterial fitness. PLoS Pathog 5:e1000541.
- 944 45. Hopkins KL, Davies RH, Threlfall EJ. 2005. Mechanisms of quinolone resistance in  
945 Escherichia coli and Salmonella: recent developments. Int J Antimicrob Agents 25:358-  
946 73.
- 947 46. Minnick MF, Wilson ZR, Smitherman LS, Samuels DS. 2003. gyrA mutations in  
948 ciprofloxacin-resistant Bartonella bacilliformis strains obtained in vitro. Antimicrob  
949 Agents Chemother 47:383-6.
- 950 47. Bagel S, Hullen V, Wiedemann B, Heisig P. 1999. Impact of gyrA and parC mutations on  
951 quinolone resistance, doubling time, and supercoiling degree of Escherichia coli.  
952 Antimicrob Agents Chemother 43:868-75.

- 953 48. Bhatnagar K, Wong A. 2019. The mutational landscape of quinolone resistance in  
954 *Escherichia coli*. *PLoS One* 14:e0224650.
- 955 49. Komp Lindgren P, Karlsson A, Hughes D. 2003. Mutation rate and evolution of  
956 fluoroquinolone resistance in *Escherichia coli* isolates from patients with urinary tract  
957 infections. *Antimicrob Agents Chemother* 47:3222-32.
- 958 50. Vinue L, Corcoran MA, Hooper DC, Jacoby GA. 2015. Mutations That Enhance the  
959 Ciprofloxacin Resistance of *Escherichia coli* with *qnrA1*. *Antimicrob Agents Chemother*  
960 60:1537-45.
- 961 51. Maneewannakul K, Levy SB. 1996. Identification for *mar* mutants among quinolone-  
962 resistant clinical isolates of *Escherichia coli*. *Antimicrob Agents Chemother* 40:1695-8.
- 963 52. Linde HJ, Notka F, Metz M, Kochanowski B, Heisig P, Lehn N. 2000. In Vivo Increase  
964 in Resistance to Ciprofloxacin in *Escherichia coli* Associated with Deletion of the C-  
965 Terminal Part of MarR. *Antimicrobial Agents and Chemotherapy* 44:1865-1868.
- 966 53. Alekshun MN, Levy SB. 1999. The *mar* regulon: multiple resistance to antibiotics and  
967 other toxic chemicals. *Trends Microbiol* 7:410-3.
- 968 54. Zhu R, Hao Z, Lou H, Song Y, Zhao J, Chen Y, Zhu J, Chen PR. 2017. Structural  
969 characterization of the DNA-binding mechanism underlying the copper(II)-sensing MarR  
970 transcriptional regulator. *J Biol Inorg Chem* 22:685-693.
- 971 55. Praski Alzrigat L, Huseby DL, Brandis G, Hughes D. 2017. Fitness cost constrains the  
972 spectrum of *marR* mutations in ciprofloxacin-resistant *Escherichia coli*. *J Antimicrob*  
973 *Chemother* 72:3016-3024.

- 974 56. Weber BS, Ly PM, Irwin JN, Pukatzki S, Feldman MF. 2015. A multidrug resistance  
975 plasmid contains the molecular switch for type VI secretion in *Acinetobacter baumannii*.  
976 *Proc Natl Acad Sci U S A* 112:9442-7.
- 977 57. Higuchi S, Onodera Y, Chiba M, Hoshino K, Gotoh N. 2013. Potent in vitro antibacterial  
978 activity of DS-8587, a novel broad-spectrum quinolone, against *Acinetobacter*  
979 *baumannii*. *Antimicrob Agents Chemother* 57:1978-81.
- 980 58. Gerson S, Nowak J, Zander E, Ertel J, Wen Y, Krut O, Seifert H, Higgins PG. 2018.  
981 Diversity of mutations in regulatory genes of resistance-nodulation-cell division efflux  
982 pumps in association with tigecycline resistance in *Acinetobacter baumannii*. *J*  
983 *Antimicrob Chemother* 73:1501-1508.
- 984 59. Marchand I, Damier-Piolle L, Courvalin P, Lambert T. 2004. Expression of the RND-  
985 type efflux pump AdeABC in *Acinetobacter baumannii* is regulated by the AdeRS two-  
986 component system. *Antimicrob Agents Chemother* 48:3298-304.
- 987 60. Xu C, Bilya SR, Xu W. 2019. adeABC efflux gene in *Acinetobacter baumannii*. *New*  
988 *Microbes New Infect* 30:100549.
- 989 61. Damier-Piolle L, Magnet S, Bremont S, Lambert T, Courvalin P. 2008. AdeIJK, a  
990 resistance-nodulation-cell division pump effluxing multiple antibiotics in *Acinetobacter*  
991 *baumannii*. *Antimicrob Agents Chemother* 52:557-62.
- 992 62. Rosenfeld N, Bouchier C, Courvalin P, Perichon B. 2012. Expression of the resistance-  
993 nodulation-cell division pump AdeIJK in *Acinetobacter baumannii* is regulated by AdeN,  
994 a TetR-type regulator. *Antimicrob Agents Chemother* 56:2504-10.

- 995 63. Sugawara E, Nikaido H. 2014. Properties of AdeABC and AdeIJK efflux systems of  
996 *Acinetobacter baumannii* compared with those of the AcrAB-TolC system of *Escherichia*  
997 *coli*. *Antimicrob Agents Chemother* 58:7250-7.
- 998 64. Coyne S, Courvalin P, Perichon B. 2011. Efflux-mediated antibiotic resistance in  
999 *Acinetobacter* spp. *Antimicrob Agents Chemother* 55:947-53.
- 1000 65. Lee JK, Lee YS, Park YK, Kim BS. 2005. Mutations in the *gyrA* and *parC* genes in  
1001 ciprofloxacin-resistant clinical isolates of *Acinetobacter baumannii* in Korea. *Microbiol*  
1002 *Immunol* 49:647-53.
- 1003 66. Vila J, Ruiz J, Goni P, Jimenez de Anta T. 1997. Quinolone-resistance mutations in the  
1004 topoisomerase IV *parC* gene of *Acinetobacter baumannii*. *J Antimicrob Chemother*  
1005 39:757-62.
- 1006 67. Qin TT, Kang HQ, Ma P, Li PP, Huang LY, Gu B. 2015. SOS response and its regulation  
1007 on the fluoroquinolone resistance. *Ann Transl Med* 3:358.
- 1008 68. Lee JK, Lee YS, Park YK, Kim BS. 2005. Alterations in the *GyrA* and *GyrB* subunits of  
1009 topoisomerase II and the *ParC* and *ParE* subunits of topoisomerase IV in ciprofloxacin-  
1010 resistant clinical isolates of *Pseudomonas aeruginosa*. *Int J Antimicrob Agents* 25:290-5.
- 1011 69. Yonezawa M, Takahata M, Matsubara N, Watanabe Y, Narita H. 1995. DNA gyrase  
1012 *gyrA* mutations in quinolone-resistant clinical isolates of *Pseudomonas aeruginosa*.  
1013 *Antimicrob Agents Chemother* 39:1970-2.
- 1014 70. Poole K, Gotoh N, Tsujimoto H, Zhao Q, Wada A, Yamasaki T, Neshat S, Yamagishi J,  
1015 Li XZ, Nishino T. 1996. Overexpression of the *mexC-mexD-oprJ* efflux operon in *nfxB*-  
1016 type multidrug-resistant strains of *Pseudomonas aeruginosa*. *Mol Microbiol* 21:713-24.



- 1017 71. Shiba T, Ishiguro K, Takemoto N, Koibuchi H, Sugimoto K. 1995. Purification and  
1018 characterization of the *Pseudomonas aeruginosa* NfxB protein, the negative regulator of  
1019 the nfxB gene. *Journal of Bacteriology* 177:5872-5877.
- 1020 72. Hooper DC, Wolfson JS, Bozza MA, Ng EY. 1992. Genetics and regulation of outer  
1021 membrane protein expression by quinolone resistance loci nfxB, nfxC, and cfxB.  
1022 *Antimicrob Agents Chemother* 36:1151-4.
- 1023 73. Stickland HG, Davenport PW, Lilley KS, Griffin JL, Welch M. 2010. Mutation of nfxB  
1024 causes global changes in the physiology and metabolism of *Pseudomonas aeruginosa*. *J*  
1025 *Proteome Res* 9:2957-67.
- 1026 74. Pursell A, Poole K. 2013. Functional characterization of the NfxB repressor of the  
1027 mexCD-oprJ multidrug efflux operon of *Pseudomonas aeruginosa*. *Microbiology*  
1028 (Reading) 159:2058-2073.
- 1029 75. Kohler T, Epp SF, Curty LK, Pechere JC. 1999. Characterization of MexT, the regulator  
1030 of the MexE-MexF-OprN multidrug efflux system of *Pseudomonas aeruginosa*. *J*  
1031 *Bacteriol* 181:6300-5.
- 1032 76. Sobel ML, Neshat S, Poole K. 2005. Mutations in PA2491 (mexS) promote MexT-  
1033 dependent mexEF-oprN expression and multidrug resistance in a clinical strain of  
1034 *Pseudomonas aeruginosa*. *J Bacteriol* 187:1246-53.
- 1035 77. Richardot C, Juarez P, Jeannot K, Patry I, Plesiat P, Llanes C. 2016. Amino Acid  
1036 Substitutions Account for Most MexS Alterations in Clinical nfxC Mutants of  
1037 *Pseudomonas aeruginosa*. *Antimicrob Agents Chemother* 60:2302-10.
- 1038 78. Wong A, Kassen R. 2011. Parallel evolution and local differentiation in quinolone  
1039 resistance in *Pseudomonas aeruginosa*. *Microbiology (Reading)* 157:937-944.

- 1040 79. Ahmed MN, Abdelsamad A, Wassermann T, Porse A, Becker J, Sommer MOA, Hoiby  
1041 N, Ciofu O. 2020. The evolutionary trajectories of *P. aeruginosa* in biofilm and  
1042 planktonic growth modes exposed to ciprofloxacin: beyond selection of antibiotic  
1043 resistance. *NPJ Biofilms Microbiomes* 6:28.
- 1044 80. Ahmed MN, Porse A, Sommer MOA, Hoiby N, Ciofu O. 2018. Evolution of Antibiotic  
1045 Resistance in Biofilm and Planktonic *Pseudomonas aeruginosa* Populations Exposed to  
1046 Subinhibitory Levels of Ciprofloxacin. *Antimicrob Agents Chemother* 62.
- 1047 81. Monti MR, Morero NR, Miguel V, Argarana CE. 2013. *nfxB* as a novel target for  
1048 analysis of mutation spectra in *Pseudomonas aeruginosa*. *PLoS One* 8:e66236.
- 1049 82. Mena A, Smith EE, Burns JL, Speert DP, Moskowitz SM, Perez JL, Oliver A. 2008.  
1050 Genetic adaptation of *Pseudomonas aeruginosa* to the airways of cystic fibrosis patients is  
1051 catalyzed by hypermutation. *Journal of Bacteriology* 190:7910-7917.
- 1052 83. Willmott CJ, Maxwell A. 1993. A single point mutation in the DNA gyrase A protein  
1053 greatly reduces binding of fluoroquinolones to the gyrase-DNA complex. *Antimicrob*  
1054 *Agents Chemother* 37:126-7.
- 1055 84. Jacoby GA. 2005. Mechanisms of resistance to quinolones. *Clin Infect Dis* 41 Suppl  
1056 2:S120-6.
- 1057 85. Gensberg K, Jin YF, Piddock LJ. 1995. A novel *gyrB* mutation in a fluoroquinolone-  
1058 resistant clinical isolate of *Salmonella typhimurium*. *FEMS Microbiol Lett* 132:57-60.
- 1059 86. Lascols C, Robert J, Cattoir V, Bebear C, Cavallo JD, Podglajen I, Ploy MC, Bonnet R,  
1060 Soussy CJ, Cambau E. 2007. Type II topoisomerase mutations in clinical isolates of  
1061 *Enterobacter cloacae* and other enterobacterial species harbouring the *qnrA* gene. *Int J*  
1062 *Antimicrob Agents* 29:402-9.

- 1063 87. Mouneimne H, Robert J, Jarlier V, Cambau E. 1999. Type II topoisomerase mutations in  
1064 ciprofloxacin-resistant strains of *Pseudomonas aeruginosa*. *Antimicrob Agents*  
1065 *Chemother* 43:62-6.
- 1066 88. Wimalasena S, Pathirana H, Shin GW, De Silva BCJ, Hossain S, Heo GJ. 2019.  
1067 Characterization of Quinolone-Resistant Determinants in Tribe Proteeae Isolated from  
1068 Pet Turtles with High Prevalence of *qnrD* and Novel *gyrB* Mutations. *Microb Drug*  
1069 *Resist* 25:611-618.
- 1070 89. Bansal S, Tandon V. 2011. Contribution of mutations in DNA gyrase and topoisomerase  
1071 IV genes to ciprofloxacin resistance in *Escherichia coli* clinical isolates. *Int J Antimicrob*  
1072 *Agents* 37:253-5.
- 1073 90. Vogwill T, MacLean RC. 2015. The genetic basis of the fitness costs of antimicrobial  
1074 resistance: a meta-analysis approach. *Evol Appl* 8:284-95.
- 1075 91. Dosselmann B, Willmann M, Steglich M, Bunk B, Nubel U, Peter S, Neher RA. 2017.  
1076 Rapid and Consistent Evolution of Colistin Resistance in Extensively Drug-Resistant  
1077 *Pseudomonas aeruginosa* during Morbidostat Culture. *Antimicrob Agents Chemother* 61.  
1078  
1079

1080 Figure 1.

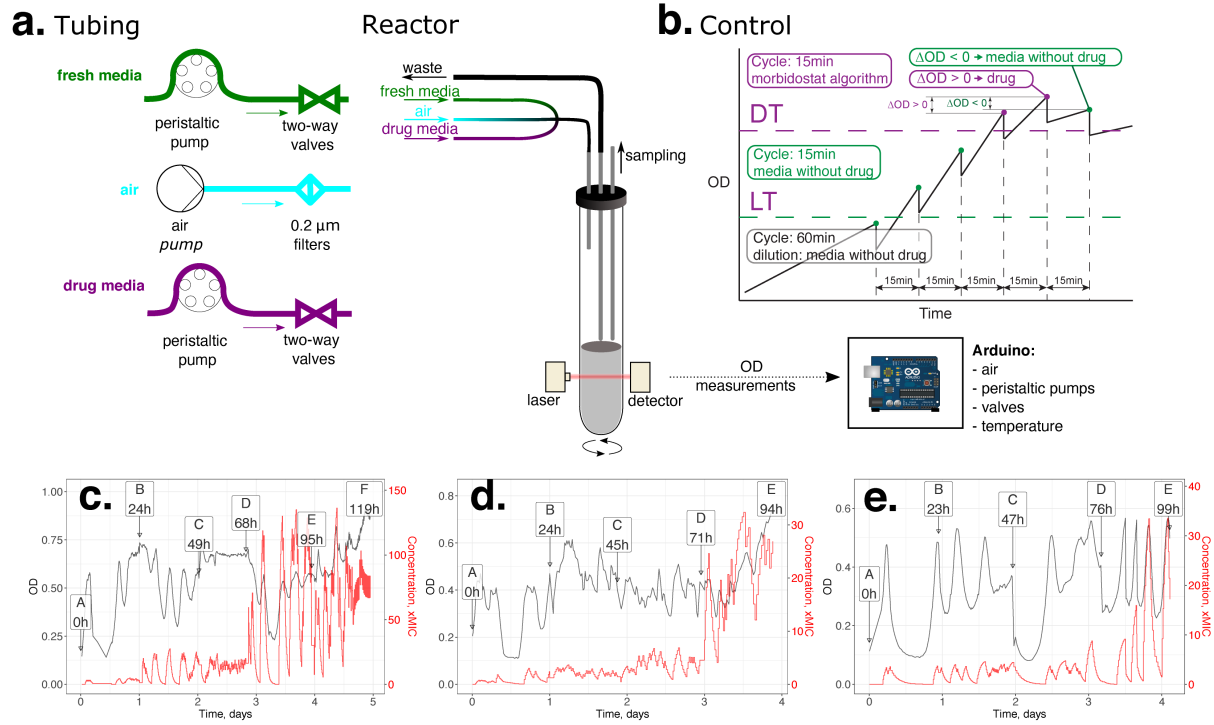

1081

1082 Figure 2.

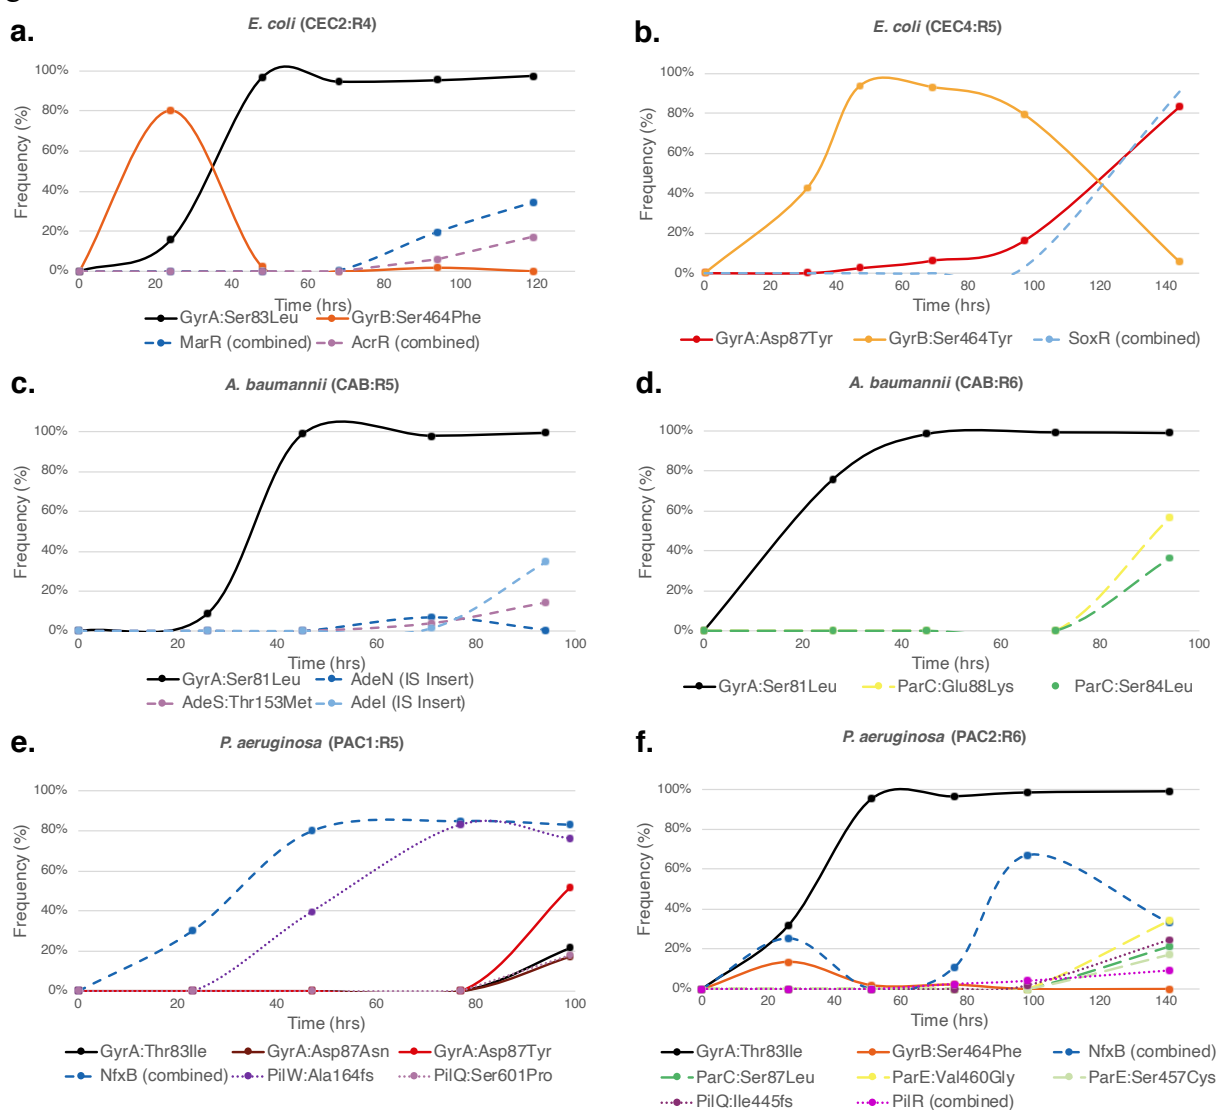

1083  
1084

1085 Figure 3.

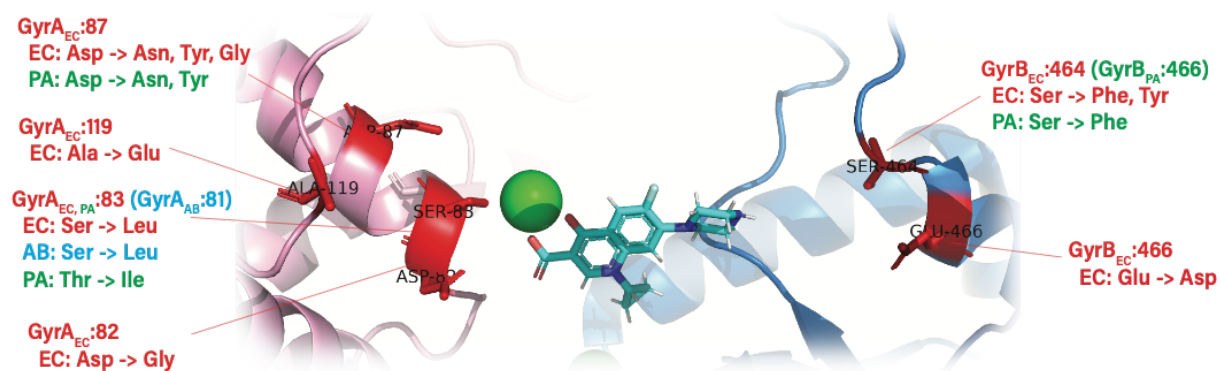

1086  
1087

1088 Figure 4.

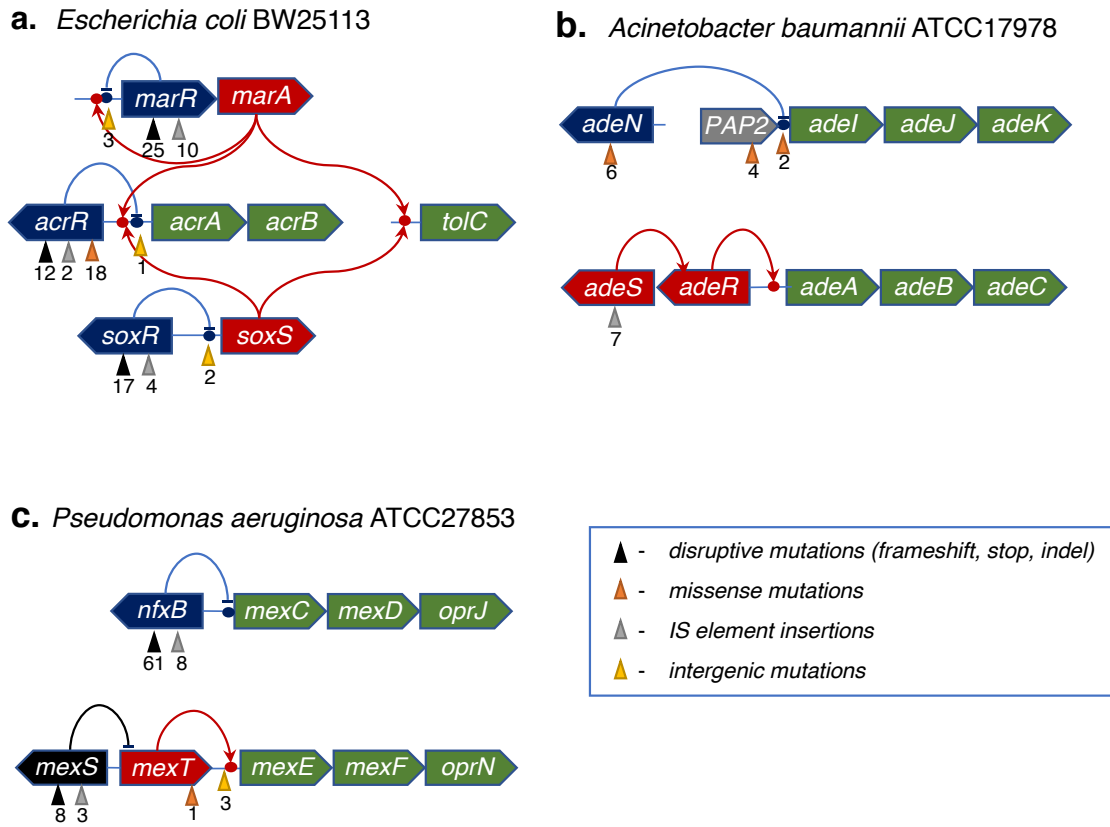

1089

1090

1091 Figure 5.

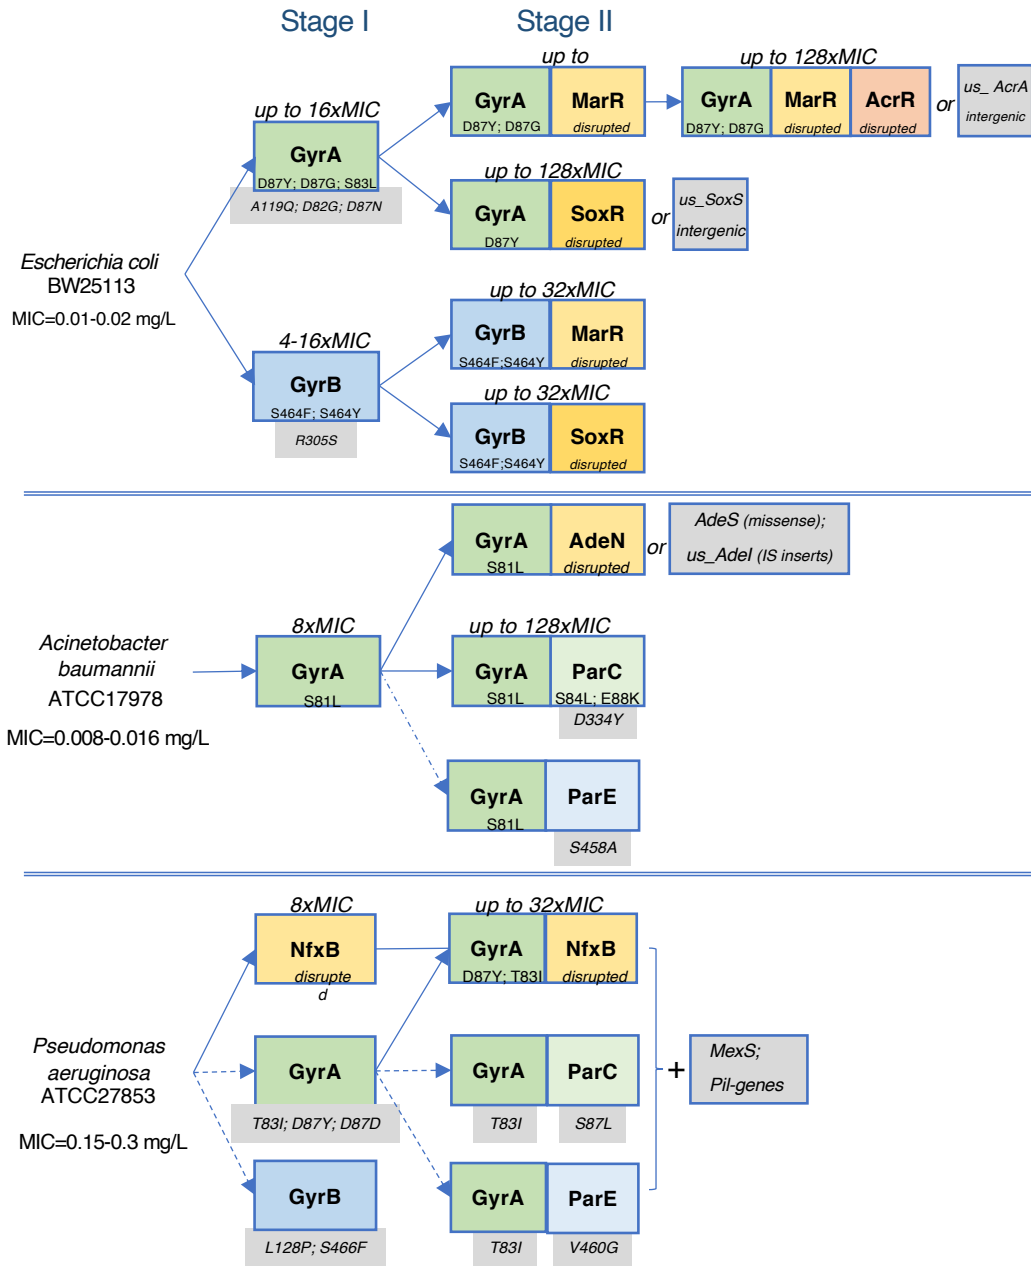

1092



## Stage I

## Stage II

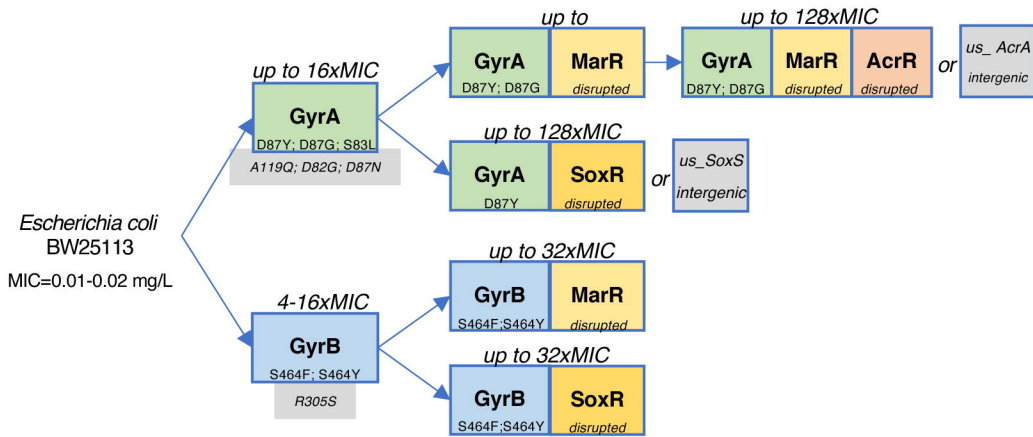

*Acinetobacter baumannii*  
ATCC 17978  
MIC=0.008-0.016 mg/L

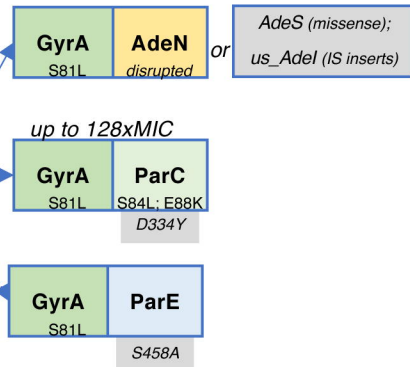

*Pseudomonas aeruginosa*  
ATCC27853  
MIC=0.15-0.3 mg/L

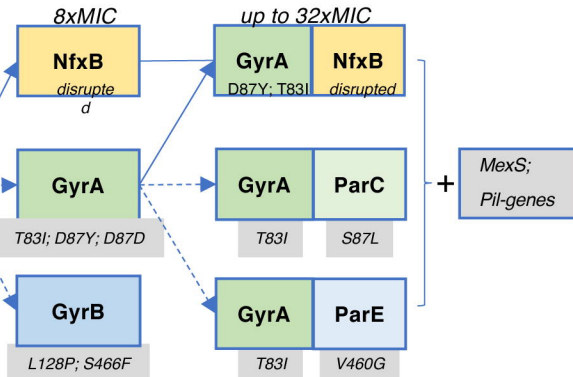

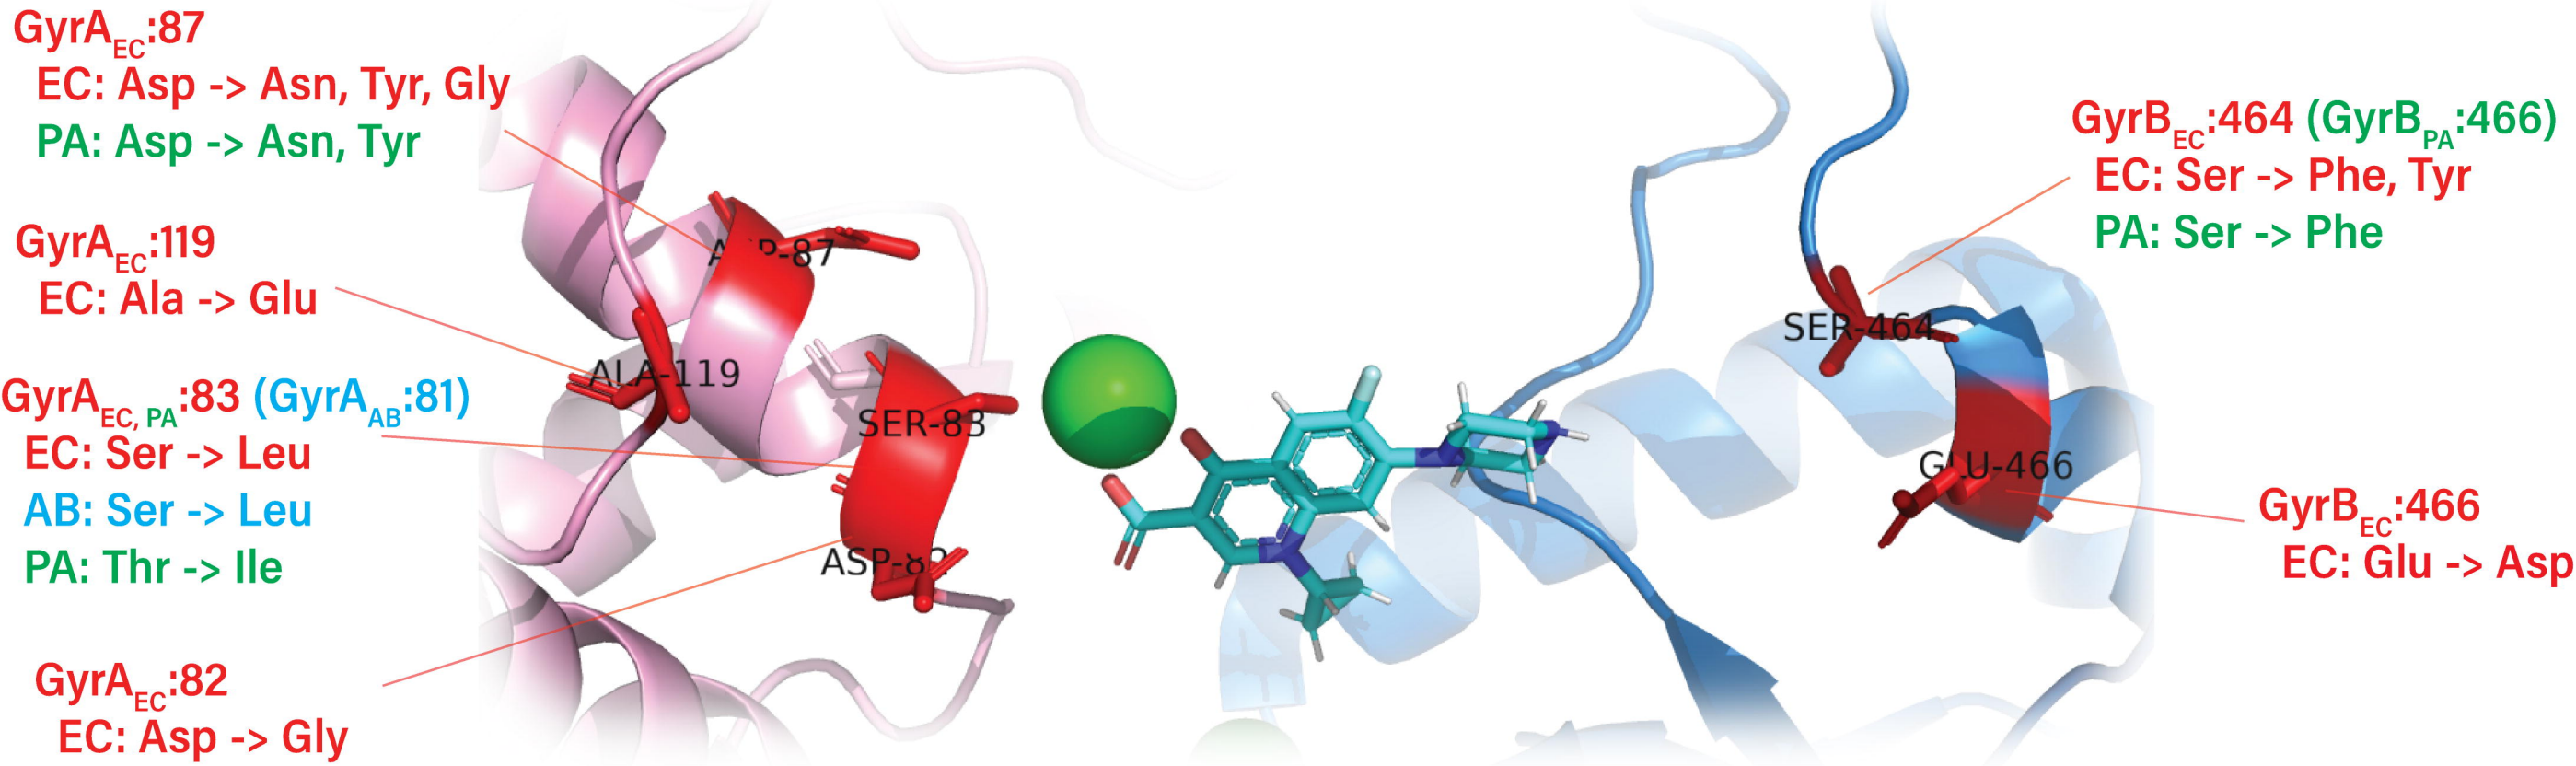

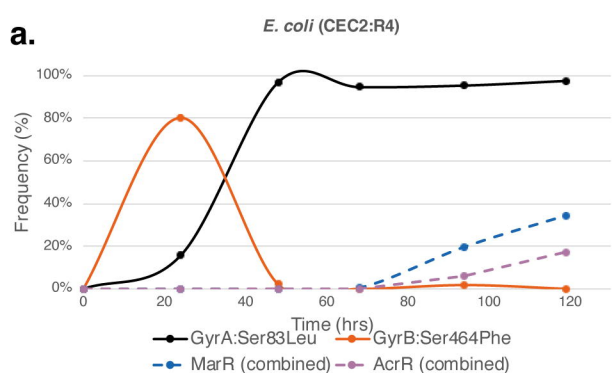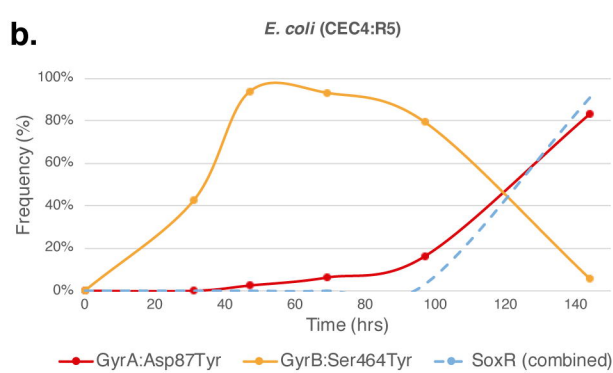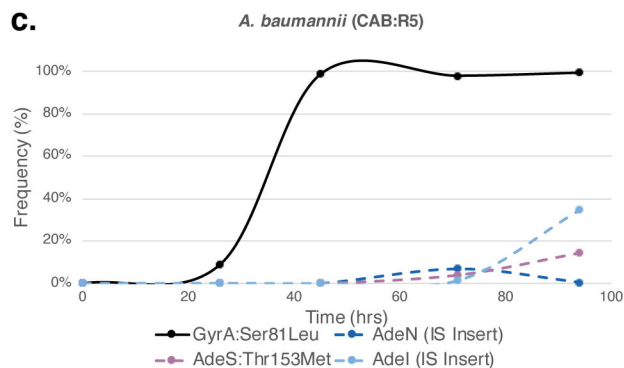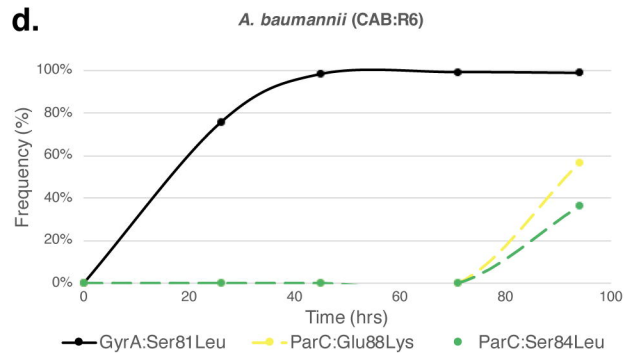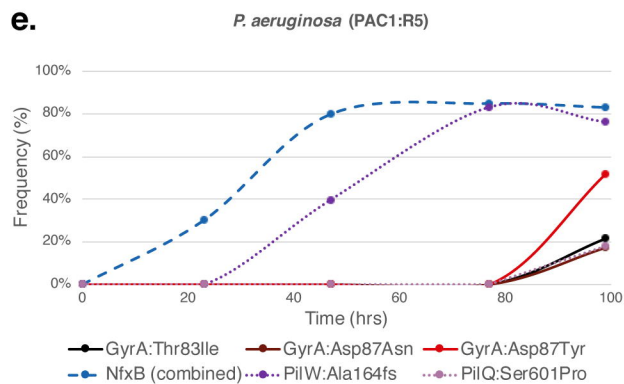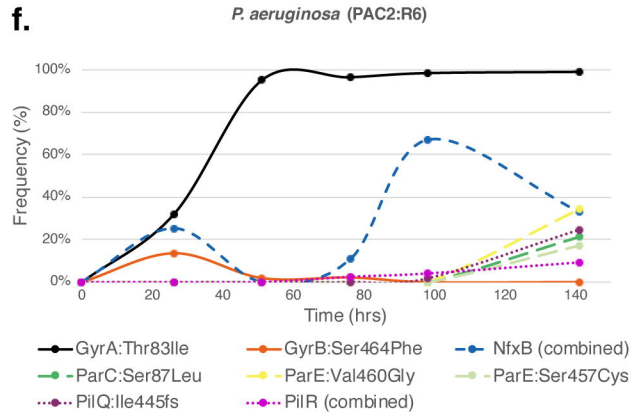

defined upon first use. Non-standard

## a. Tubing

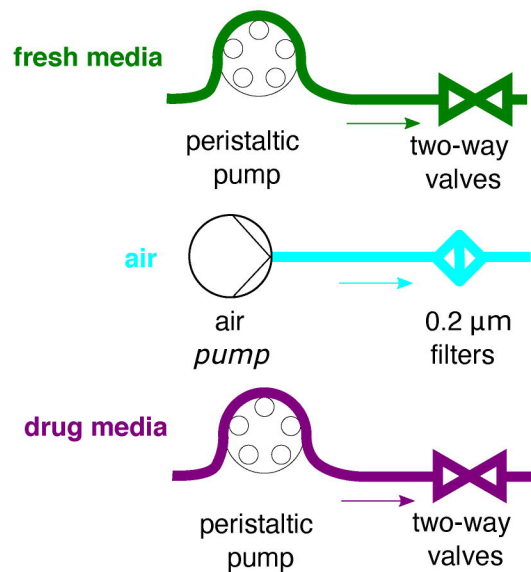

## Reactor

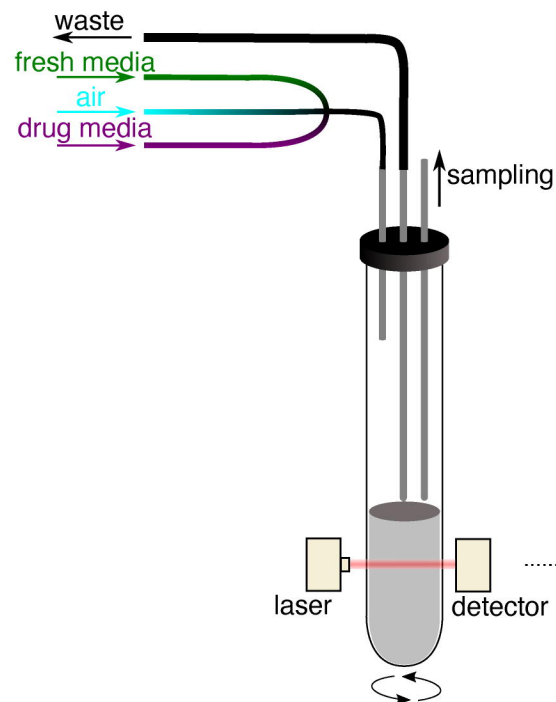

## b. Control

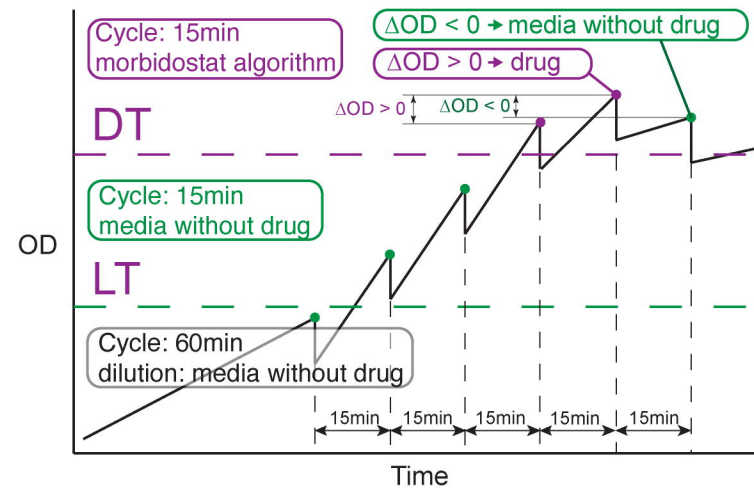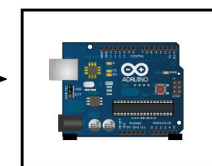

### Arduino:

- air
- peristaltic pumps
- valves
- temperature

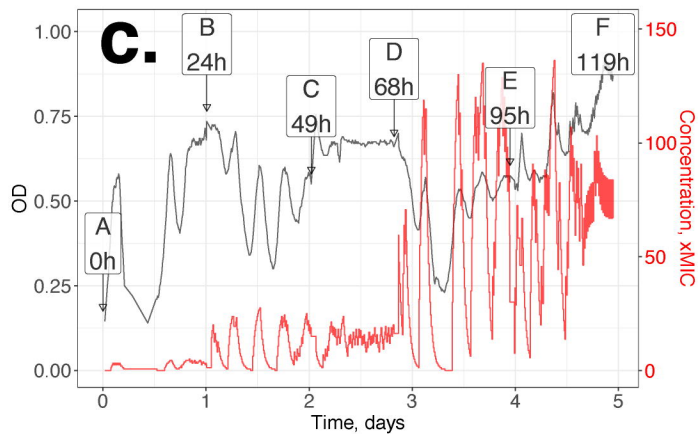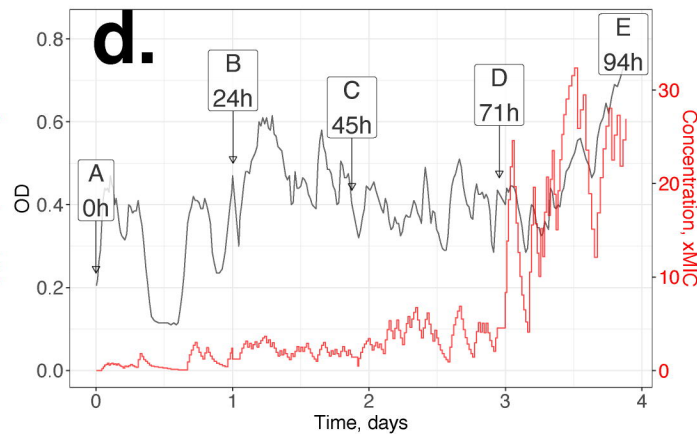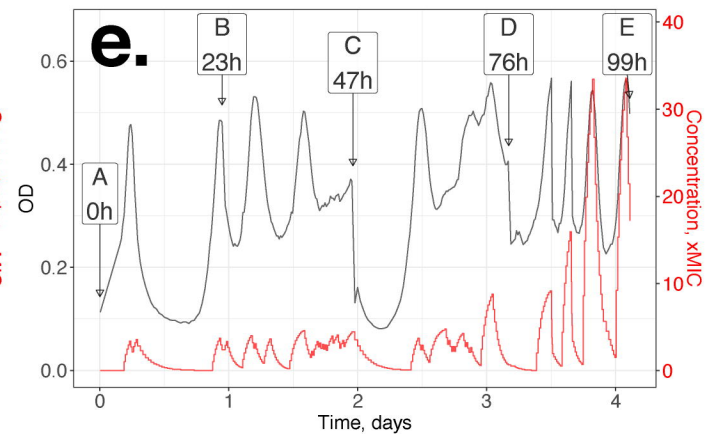

**a.** *Escherichia coli* BW25113

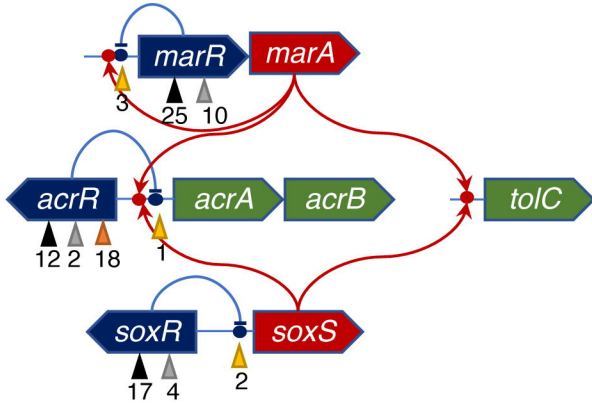

**b.** *Acinetobacter baumannii* ATCC17978

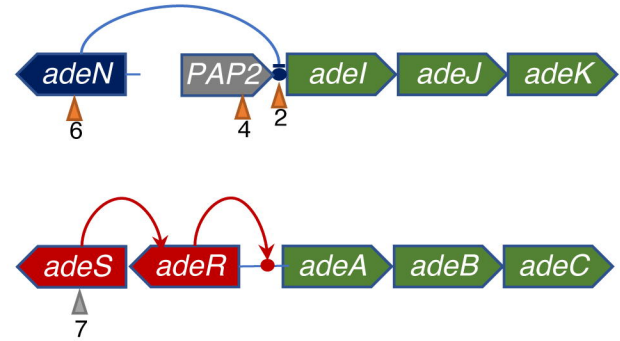

**c.** *Pseudomonas aeruginosa* ATCC27853

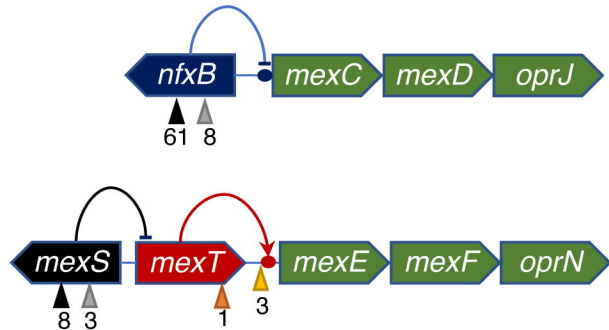

- ▲ - disruptive mutations (frameshift, stop, indel)
- ▲ - missense mutations
- ▲ - IS element insertions
- ▲ - intergenic mutations
